# Supplementary material for: The atmospheric chemistry general circulation model ECHAM5/MESSy1: consistent simulation of ozone from the surface to the mesosphere
Source: Copernicus journal article supplement (doi:10.5194/acp-6-5067-2006), 2006-11-07
Supplement: Supplementary file 1 [file acp-6-5067-2006-supplement.zip]

# The Chemical Mechanism of MECCA

Rolf Sander & Astrid Kerkweg

sander@mpch-mainz.mpg.de, akerkweg@mpch-mainz.mpg.de

Air Chemistry Department, Max-Planck Institute of Chemistry, PO Box 3060, 55020 Mainz, Germany

(mechanism generated on February 8, 2006)

Table 1: Gas phase reactions

| #       | labels | reaction                                                                          | rate coefficient                                                                        | reference                                                |
|---------|--------|-----------------------------------------------------------------------------------|-----------------------------------------------------------------------------------------|----------------------------------------------------------|
| G1000   | StTrG  | $\text{O}_2 + \text{O}(^1\text{D}) \rightarrow \text{O}(^3\text{P}) + \text{O}_2$ | $3.2\text{E}-11*\text{EXP}(70./\text{temp})$                                            | Sander et al. (2003)                                     |
| G1001   | StTrG  | $\text{O}_2 + \text{O}(^3\text{P}) \rightarrow \text{O}_3$                        | $6.\text{E}-34*((\text{temp}/300.)**(-2.4))*\text{cair}$                                | Sander et al. (2003)                                     |
| G1002   | StG    | $\text{O}_3 + \text{O}(^1\text{D}) \rightarrow 2 \text{O}_2$                      | $1.2\text{E}-10$                                                                        | Sander et al. (2003)*                                    |
| G1003   | StG    | $\text{O}_3 + \text{O}(^3\text{P}) \rightarrow 2 \text{O}_2$                      | $8.\text{E}-12*\text{EXP}(-2060./\text{temp})$                                          | Sander et al. (2003)                                     |
| G01Diag | DiagG  | $\text{O}_3(\text{s}) \rightarrow \text{LO}_3(\text{s})$                          | k_03s                                                                                   | Roelofs and Lelieveld (1997)*                            |
| G2100   | StTrG  | $\text{H} + \text{O}_2 \rightarrow \text{HO}_2$                                   | $\text{k\_3rd}(\text{temp}, \text{cair}, 5.7\text{E}-32, 1.6, 7.5\text{E}-11, 0., 0.6)$ | Sander et al. (2003)                                     |
| G2101   | StG    | $\text{H} + \text{O}_3 \rightarrow \text{OH}$                                     | $1.4\text{E}-10*\text{EXP}(-470./\text{temp})$                                          | Sander et al. (2003)                                     |
| G2102   | StG    | $\text{H}_2 + \text{O}(^1\text{D}) \rightarrow \text{H} + \text{OH}$              | $1.1\text{E}-10$                                                                        | Sander et al. (2003)                                     |
| G2103   | StG    | $\text{OH} + \text{O}(^3\text{P}) \rightarrow \text{H}$                           | $2.2\text{E}-11*\text{EXP}(120./\text{temp})$                                           | Sander et al. (2003)                                     |
| G2104   | StTrG  | $\text{OH} + \text{O}_3 \rightarrow \text{HO}_2$                                  | $1.7\text{E}-12*\text{EXP}(-940./\text{temp})$                                          | Sander et al. (2003)                                     |
| G2105   | StTrG  | $\text{OH} + \text{H}_2 \rightarrow \text{H}_2\text{O} + \text{H}$                | $5.5\text{E}-12*\text{EXP}(-2000./\text{temp})$                                         | Sander et al. (2003)                                     |
| G2106   | StG    | $\text{HO}_2 + \text{O}(^3\text{P}) \rightarrow \text{OH}$                        | $3.\text{E}-11*\text{EXP}(200./\text{temp})$                                            | Sander et al. (2003)                                     |
| G2107   | StTrG  | $\text{HO}_2 + \text{O}_3 \rightarrow \text{OH}$                                  | $1.\text{E}-14*\text{EXP}(-490./\text{temp})$                                           | Sander et al. (2003)                                     |
| G2108a  | StG    | $\text{HO}_2 + \text{H} \rightarrow 2 \text{OH}$                                  | $0.69*8.1\text{E}-11$                                                                   | Sander et al. (2003)*                                    |
| G2108b  | StG    | $\text{HO}_2 + \text{H} \rightarrow \text{H}_2$                                   | $0.29*8.1\text{E}-11$                                                                   | Sander et al. (2003)*                                    |
| G2108c  | StG    | $\text{HO}_2 + \text{H} \rightarrow \text{O}(^3\text{P}) + \text{H}_2\text{O}$    | $0.02*8.1\text{E}-11$                                                                   | Sander et al. (2003)*                                    |
| G2109   | StTrG  | $\text{HO}_2 + \text{OH} \rightarrow \text{H}_2\text{O}$                          | $4.8\text{E}-11*\text{EXP}(250./\text{temp})$                                           | Sander et al. (2003)                                     |
| G2110   | StTrG  | $\text{HO}_2 + \text{HO}_2 \rightarrow \text{H}_2\text{O}_2$                      | k_H02_H02                                                                               | Christensen et al. (2002),<br>Kircher and Sander (1984)* |
| G2111   | StTrG  | $\text{H}_2\text{O} + \text{O}(^1\text{D}) \rightarrow 2 \text{OH}$               | $2.2\text{E}-10$                                                                        | Sander et al. (2003)                                     |
| G2112   | StTrG  | $\text{H}_2\text{O}_2 + \text{OH} \rightarrow \text{H}_2\text{O} + \text{HO}_2$   | $2.9\text{E}-12*\text{EXP}(-160./\text{temp})$                                          | Sander et al. (2003)                                     |
| G3100   | StGN   | $\text{N} + \text{O}_2 \rightarrow \text{NO} + \text{O}(^3\text{P})$              | $1.5\text{E}-11*\text{EXP}(-3600./\text{temp})$                                         | Sander et al. (2003)                                     |
| G3101   | StTrG  | $\text{N}_2 + \text{O}(^1\text{D}) \rightarrow \text{O}(^3\text{P}) + \text{N}_2$ | $1.8\text{E}-11*\text{EXP}(110./\text{temp})$                                           | Sander et al. (2003)                                     |
| G3102a  | StGN   | $\text{N}_2\text{O} + \text{O}(^1\text{D}) \rightarrow 2 \text{NO}$               | $6.7\text{E}-11$                                                                        | Sander et al. (2003)                                     |

Table 1: Gas phase reactions (... continued)

| #      | labels | reaction                                                                                                                                    | rate coefficient                                                                                    | reference              |
|--------|--------|---------------------------------------------------------------------------------------------------------------------------------------------|-----------------------------------------------------------------------------------------------------|------------------------|
| G3102b | StGN   | $\text{N}_2\text{O} + \text{O}(^1\text{D}) \rightarrow \text{N}_2 + \text{O}_2$                                                             | 4.9E-11                                                                                             | Sander et al. (2003)   |
| G3103  | StTrGN | $\text{NO} + \text{O}_3 \rightarrow \text{NO}_2 + \text{O}_2$                                                                               | $3.5 \times 10^{-12} \exp(-1500./\text{temp})$                                                      | Sander et al. (2003)   |
| G3104  | StGN   | $\text{NO} + \text{N} \rightarrow \text{O}(^3\text{P}) + \text{N}_2$                                                                        | $2.1 \times 10^{-11} \exp(100./\text{temp})$                                                        | Sander et al. (2003)   |
| G3105  | StGN   | $\text{NO}_2 + \text{O}(^3\text{P}) \rightarrow \text{NO} + \text{O}_2$                                                                     | $5.6 \times 10^{-12} \exp(180./\text{temp})$                                                        | Sander et al. (2003)   |
| G3106  | StTrGN | $\text{NO}_2 + \text{O}_3 \rightarrow \text{NO}_3 + \text{O}_2$                                                                             | $1.2 \times 10^{-13} \exp(-2450./\text{temp})$                                                      | Sander et al. (2003)   |
| G3107  | StGN   | $\text{NO}_2 + \text{N} \rightarrow \text{N}_2\text{O} + \text{O}(^3\text{P})$                                                              | $5.8 \times 10^{-12} \exp(220./\text{temp})$                                                        | Sander et al. (2003)   |
| G3108  | StTrGN | $\text{NO}_3 + \text{NO} \rightarrow 2 \text{NO}_2$                                                                                         | $1.5 \times 10^{-11} \exp(170./\text{temp})$                                                        | Sander et al. (2003)   |
| G3109  | StTrGN | $\text{NO}_3 + \text{NO}_2 \rightarrow \text{N}_2\text{O}_5$                                                                                | k_N03_N02                                                                                           | Sander et al. (2003)*  |
| G3110  | StTrGN | $\text{N}_2\text{O}_5 \rightarrow \text{NO}_2 + \text{NO}_3$                                                                                | $k_{\text{N03\_N02}} / (3.5 \times 10^{-27} \exp(10990./\text{temp}))$                              | Sander et al. (2003)*  |
| G3200  | TrG    | $\text{NO} + \text{OH} \rightarrow \text{HONO}$                                                                                             | $k_{\text{3rd}}(\text{temp}, \text{cair}, 7.5 \times 10^{-31}, 2.6, 3.6 \times 10^{-11}, 0.1, 0.6)$ | Sander et al. (2003)   |
| G3201  | StTrGN | $\text{NO} + \text{HO}_2 \rightarrow \text{NO}_2 + \text{OH}$                                                                               | $3.5 \times 10^{-12} \exp(250./\text{temp})$                                                        | Sander et al. (2003)   |
| G3202  | StTrGN | $\text{NO}_2 + \text{OH} \rightarrow \text{HNO}_3$                                                                                          | $k_{\text{3rd}}(\text{temp}, \text{cair}, 2.5 \times 10^{-30}, 3., 2.5 \times 10^{-11}, 0., 0.6)$   | Sander et al. (2003)   |
| G3203  | StTrGN | $\text{NO}_2 + \text{HO}_2 \rightarrow \text{HNO}_4$                                                                                        | k_N02_H02                                                                                           | Sander et al. (2003)   |
| G3204  | TrGN   | $\text{NO}_3 + \text{HO}_2 \rightarrow \text{NO}_2 + \text{OH} + \text{O}_2$                                                                | $3.5 \times 10^{-12}$                                                                               | Sander et al. (2003)   |
| G3205  | TrG    | $\text{HONO} + \text{OH} \rightarrow \text{NO}_2 + \text{H}_2\text{O}$                                                                      | $1.8 \times 10^{-11} \exp(-390./\text{temp})$                                                       | Sander et al. (2003)   |
| G3206  | StTrGN | $\text{HNO}_3 + \text{OH} \rightarrow \text{H}_2\text{O} + \text{NO}_3$                                                                     | k_HN03_OH                                                                                           | Sander et al. (2003)*  |
| G3207  | StTrGN | $\text{HNO}_4 \rightarrow \text{NO}_2 + \text{HO}_2$                                                                                        | $k_{\text{N02\_H02}} / (2.1 \times 10^{-27} \exp(10900./\text{temp}))$                              | Sander et al. (2003)*  |
| G3208  | StTrGN | $\text{HNO}_4 + \text{OH} \rightarrow \text{NO}_2 + \text{H}_2\text{O}$                                                                     | $1.3 \times 10^{-12} \exp(380./\text{temp})$                                                        | Sander et al. (2003)   |
| G4100  | StG    | $\text{CH}_4 + \text{O}(^1\text{D}) \rightarrow .75 \text{CH}_3\text{O}_2 + .75 \text{OH} + .25 \text{HCHO} + .4 \text{H} + .05 \text{H}_2$ | $1.5 \times 10^{-10}$                                                                               | Sander et al. (2003)   |
| G4101  | StTrG  | $\text{CH}_4 + \text{OH} \rightarrow \text{CH}_3\text{O}_2 + \text{H}_2\text{O}$                                                            | $1.85 \times 10^{-20} \exp(2.82 \log(\text{temp}) - 987./\text{temp})$                              | Atkinson (2003)*       |
| G4102  | TrG    | $\text{CH}_3\text{OH} + \text{OH} \rightarrow \text{HCHO} + \text{HO}_2$                                                                    | $7.3 \times 10^{-12} \exp(-620./\text{temp})$                                                       | Sander et al. (2003)   |
| G4103a | StTrG  | $\text{CH}_3\text{O}_2 + \text{HO}_2 \rightarrow \text{CH}_3\text{OOH}$                                                                     | $4.1 \times 10^{-13} \exp(750./\text{temp}) / (1. + 497.7 \exp(1160./\text{temp}))$                 | Sander et al. (2003)*  |
| G4103b | StTrG  | $\text{CH}_3\text{O}_2 + \text{HO}_2 \rightarrow \text{HCHO} + \text{H}_2\text{O} + \text{O}_2$                                             | $4.1 \times 10^{-13} \exp(750./\text{temp}) / (1. + 497.7 \exp(-1160./\text{temp}))$                | Sander et al. (2003)*  |
| G4104  | StTrGN | $\text{CH}_3\text{O}_2 + \text{NO} \rightarrow \text{HCHO} + \text{NO}_2 + \text{HO}_2$                                                     | $2.8 \times 10^{-12} \exp(300./\text{temp})$                                                        | Sander et al. (2003)   |
| G4105  | TrGN   | $\text{CH}_3\text{O}_2 + \text{NO}_3 \rightarrow \text{HCHO} + \text{HO}_2 + \text{NO}_2$                                                   | $1.3 \times 10^{-12}$                                                                               | Atkinson et al. (1999) |
| G4106a | StTrG  | $\text{CH}_3\text{O}_2 + \text{CH}_3\text{O}_2 \rightarrow 2 \text{HCHO} + 2 \text{HO}_2$                                                   | $9.5 \times 10^{-14} \exp(390./\text{temp}) / (1. + 26.2 \exp(1130./\text{temp}))$                  | Sander et al. (2003)   |
| G4106b | StTrG  | $\text{CH}_3\text{O}_2 + \text{CH}_3\text{O}_2 \rightarrow \text{HCHO} + \text{CH}_3\text{OH}$                                              | $9.5 \times 10^{-14} \exp(390./\text{temp}) / (1. + 26.2 \exp(-1130./\text{temp}))$                 | Sander et al. (2003)   |
| G4107  | StTrG  | $\text{CH}_3\text{OOH} + \text{OH} \rightarrow .7 \text{CH}_3\text{O}_2 + .3 \text{HCHO} + .3 \text{OH} + \text{H}_2\text{O}$               | k_CH300H_OH                                                                                         | Sander et al. (2003)*  |

Table 1: Gas phase reactions (... continued)

| #      | labels | reaction                                                                                                                                                                               | rate coefficient                                                                                      | reference                                              |
|--------|--------|----------------------------------------------------------------------------------------------------------------------------------------------------------------------------------------|-------------------------------------------------------------------------------------------------------|--------------------------------------------------------|
| G4108  | StTrG  | $\text{HCHO} + \text{OH} \rightarrow \text{CO} + \text{H}_2\text{O} + \text{HO}_2$                                                                                                     | $9.52\text{E-}18 \cdot \text{EXP}(2.03 \cdot \log(\text{temp}) + 636./\text{temp})$                   | Sivakumaran et al. (2003)                              |
| G4109  | TrGN   | $\text{HCHO} + \text{NO}_3 \rightarrow \text{HNO}_3 + \text{CO} + \text{HO}_2$                                                                                                         | $3.4\text{E-}13 \cdot \text{EXP}(-1900./\text{temp})$                                                 | Sander et al. (2003)*                                  |
| G4110  | StTrG  | $\text{CO} + \text{OH} \rightarrow \text{H} + \text{CO}_2$                                                                                                                             | $1.57\text{E-}13 + \text{cair} \cdot 3.54\text{E-}33$                                                 | McCabe et al. (2001)                                   |
| G4111  | TrG    | $\text{HCOOH} + \text{OH} \rightarrow \text{HO}_2$                                                                                                                                     | $4.\text{E-}13$                                                                                       | Sander et al. (2003)                                   |
| G4200  | TrGC   | $\text{C}_2\text{H}_6 + \text{OH} \rightarrow \text{C}_2\text{H}_5\text{O}_2 + \text{H}_2\text{O}$                                                                                     | $1.49\text{E-}17 \cdot \text{temp} \cdot \text{temp} \cdot \text{EXP}(-499./\text{temp})$             | Atkinson (2003)                                        |
| G4201  | TrGC   | $\text{C}_2\text{H}_4 + \text{O}_3 \rightarrow \text{HCHO} + .22 \text{HO}_2 + .12 \text{OH} + .23 \text{CO} + .54 \text{HCOOH} + .1 \text{H}_2$                                       | $1.2\text{E-}14 \cdot \text{EXP}(-2630./\text{temp})$                                                 | Sander et al. (2003)*                                  |
| G4202  | TrGC   | $\text{C}_2\text{H}_4 + \text{OH} \rightarrow .6666667 \text{CH}_3\text{CH}(\text{O}_2)\text{CH}_2\text{OH}$                                                                           | $\text{k\_3rd}(\text{temp}, \text{cair}, 1.\text{E-}28, 0.8, 8.8\text{E-}12, 0., 0.6)$                | Sander et al. (2003)                                   |
| G4203  | TrGC   | $\text{C}_2\text{H}_5\text{O}_2 + \text{HO}_2 \rightarrow \text{C}_2\text{H}_5\text{OOH}$                                                                                              | $7.5\text{E-}13 \cdot \text{EXP}(700./\text{temp})$                                                   | Sander et al. (2003)                                   |
| G4204  | TrGNC  | $\text{C}_2\text{H}_5\text{O}_2 + \text{NO} \rightarrow \text{CH}_3\text{CHO} + \text{HO}_2 + \text{NO}_2$                                                                             | $2.6\text{E-}12 \cdot \text{EXP}(365./\text{temp})$                                                   | Sander et al. (2003)                                   |
| G4205  | TrGNC  | $\text{C}_2\text{H}_5\text{O}_2 + \text{NO}_3 \rightarrow \text{CH}_3\text{CHO} + \text{HO}_2 + \text{NO}_2$                                                                           | $2.3\text{E-}12$                                                                                      | Atkinson et al. (1999)                                 |
| G4206  | TrGC   | $\text{C}_2\text{H}_5\text{O}_2 + \text{CH}_3\text{O}_2 \rightarrow .75 \text{HCHO} + \text{HO}_2 + .75 \text{CH}_3\text{CHO} + .25 \text{CH}_3\text{OH}$                              | $1.6\text{E-}13 \cdot \text{EXP}(195./\text{temp})$                                                   | see note                                               |
| G4207  | TrGC   | $\text{C}_2\text{H}_5\text{OOH} + \text{OH} \rightarrow .3 \text{C}_2\text{H}_5\text{O}_2 + .7 \text{CH}_3\text{CHO} + .7 \text{OH}$                                                   | $\text{k\_CH300H\_OH}$                                                                                | see note                                               |
| G4208  | TrGC   | $\text{CH}_3\text{CHO} + \text{OH} \rightarrow \text{CH}_3\text{C}(\text{O})\text{OO} + \text{H}_2\text{O}$                                                                            | $5.6\text{E-}12 \cdot \text{EXP}(270./\text{temp})$                                                   | Sander et al. (2003)                                   |
| G4209  | TrGNC  | $\text{CH}_3\text{CHO} + \text{NO}_3 \rightarrow \text{CH}_3\text{C}(\text{O})\text{OO} + \text{HNO}_3$                                                                                | $1.4\text{E-}12 \cdot \text{EXP}(-1900./\text{temp})$                                                 | Sander et al. (2003)                                   |
| G4210  | TrGC   | $\text{CH}_3\text{COOH} + \text{OH} \rightarrow \text{CH}_3\text{O}_2$                                                                                                                 | $4.\text{E-}13 \cdot \text{EXP}(200./\text{temp})$                                                    | Sander et al. (2003)                                   |
| G4211a | TrGC   | $\text{CH}_3\text{C}(\text{O})\text{OO} + \text{HO}_2 \rightarrow \text{CH}_3\text{C}(\text{O})\text{OOH}$                                                                             | $4.3\text{E-}13 \cdot \text{EXP}(1040./\text{temp}) / (1.+1./37. \cdot \text{EXP}(660./\text{temp}))$ | Tyndall et al. (2001)                                  |
| G4211b | TrGC   | $\text{CH}_3\text{C}(\text{O})\text{OO} + \text{HO}_2 \rightarrow \text{CH}_3\text{COOH} + \text{O}_3$                                                                                 | $4.3\text{E-}13 \cdot \text{EXP}(1040./\text{temp}) / (1.+37. \cdot \text{EXP}(-660./\text{temp}))$   | Tyndall et al. (2001)                                  |
| G4212  | TrGNC  | $\text{CH}_3\text{C}(\text{O})\text{OO} + \text{NO} \rightarrow \text{CH}_3\text{O}_2 + \text{NO}_2$                                                                                   | $8.1\text{E-}12 \cdot \text{EXP}(270./\text{temp})$                                                   | Tyndall et al. (2001)                                  |
| G4213  | TrGNC  | $\text{CH}_3\text{C}(\text{O})\text{OO} + \text{NO}_2 \rightarrow \text{PAN}$                                                                                                          | $\text{k\_PA\_NO2}$                                                                                   | Tyndall et al. (2001)                                  |
| G4214  | TrGNC  | $\text{CH}_3\text{C}(\text{O})\text{OO} + \text{NO}_3 \rightarrow \text{CH}_3\text{O}_2 + \text{NO}_2$                                                                                 | $4.\text{E-}12$                                                                                       | Canosa-Mas et al. (1996)                               |
| G4215a | TrGC   | $\text{CH}_3\text{C}(\text{O})\text{OO} + \text{CH}_3\text{O}_2 \rightarrow \text{HCHO} + \text{HO}_2 + \text{CH}_3\text{O}_2 + \text{CO}_2$                                           | $0.9 \cdot 2.\text{E-}12 \cdot \text{EXP}(500./\text{temp})$                                          | Sander et al. (2003)                                   |
| G4215b | TrGC   | $\text{CH}_3\text{C}(\text{O})\text{OO} + \text{CH}_3\text{O}_2 \rightarrow \text{CH}_3\text{COOH} + \text{HCHO} + \text{CO}_2$                                                        | $0.1 \cdot 2.\text{E-}12 \cdot \text{EXP}(500./\text{temp})$                                          | Sander et al. (2003)                                   |
| G4216  | TrGC   | $\text{CH}_3\text{C}(\text{O})\text{OO} + \text{C}_2\text{H}_5\text{O}_2 \rightarrow .82 \text{CH}_3\text{O}_2 + \text{CH}_3\text{CHO} + .82 \text{HO}_2 + .18 \text{CH}_3\text{COOH}$ | $4.9\text{E-}12 \cdot \text{EXP}(211./\text{temp})$                                                   | Atkinson et al. (1999), Kirchner and Stockwell (1996)* |
| G4217  | TrGC   | $\text{CH}_3\text{C}(\text{O})\text{OO} + \text{CH}_3\text{C}(\text{O})\text{OO} \rightarrow 2 \text{CH}_3\text{O}_2 + 2 \text{CO}_2 + \text{O}_2$                                     | $2.5\text{E-}12 \cdot \text{EXP}(500./\text{temp})$                                                   | Tyndall et al. (2001)                                  |
| G4218  | TrGC   | $\text{CH}_3\text{C}(\text{O})\text{OOH} + \text{OH} \rightarrow \text{CH}_3\text{C}(\text{O})\text{OO}$                                                                               | $\text{k\_CH300H\_OH}$                                                                                | see note                                               |
| G4219  | TrGNC  | $\text{NACA} + \text{OH} \rightarrow \text{NO}_2 + \text{HCHO} + \text{CO}$                                                                                                            | $5.6\text{E-}12 \cdot \text{EXP}(270./\text{temp})$                                                   | see note                                               |
| G4220  | TrGNC  | $\text{PAN} + \text{OH} \rightarrow \text{HCHO} + \text{NO}_2$                                                                                                                         | $2.\text{E-}14$                                                                                       | see note                                               |
| G4221  | TrGNC  | $\text{PAN} \rightarrow \text{CH}_3\text{C}(\text{O})\text{OO} + \text{NO}_2$                                                                                                          | $\text{k\_PAN\_M}$                                                                                    | Sander et al. (2003)*                                  |
| G4300  | TrGC   | $\text{C}_3\text{H}_8 + \text{OH} \rightarrow .82 \text{C}_3\text{H}_7\text{O}_2 + .18 \text{C}_2\text{H}_5\text{O}_2 + \text{H}_2\text{O}$                                            | $1.65\text{E-}17 \cdot \text{temp} \cdot \text{temp} \cdot \text{EXP}(-87./\text{temp})$              | Atkinson (2003)                                        |

Table 1: Gas phase reactions (... continued)

| #     | labels | reaction                                                                                                                                                                                                                                                                                                                                    | rate coefficient                                                                       | reference                     |
|-------|--------|---------------------------------------------------------------------------------------------------------------------------------------------------------------------------------------------------------------------------------------------------------------------------------------------------------------------------------------------|----------------------------------------------------------------------------------------|-------------------------------|
| G4301 | TrGC   | $\text{C}_3\text{H}_6 + \text{O}_3 \rightarrow .57 \text{HCHO} + .47 \text{CH}_3\text{CHO} + .33 \text{OH} + .26 \text{HO}_2 + .07 \text{CH}_3\text{O}_2 + .06 \text{C}_2\text{H}_5\text{O}_2 + .23 \text{CH}_3\text{C(O)OO} + .04 \text{CH}_3\text{COCHO} + .06 \text{CH}_4 + .31 \text{CO} + .22 \text{HCOOH} + .03 \text{CH}_3\text{OH}$ | $6.5\text{E-}15*\text{EXP}(-1900./\text{temp})$                                        | Sander et al. (2003)*         |
| G4302 | TrGC   | $\text{C}_3\text{H}_6 + \text{OH} \rightarrow \text{CH}_3\text{CH}(\text{O}_2)\text{CH}_2\text{OH}$                                                                                                                                                                                                                                         | $k_{3\text{rd}}(\text{temp}, \text{cair}, 8.\text{E-}27, 3.5, 3.\text{E-}11, 0., 0.5)$ | Atkinson et al. (1999)        |
| G4303 | TrGNC  | $\text{C}_3\text{H}_6 + \text{NO}_3 \rightarrow \text{ONIT}$                                                                                                                                                                                                                                                                                | $4.6\text{E-}13*\text{EXP}(-1155./\text{temp})$                                        | Atkinson et al. (1999)        |
| G4304 | TrGC   | $\text{C}_3\text{H}_7\text{O}_2 + \text{HO}_2 \rightarrow \text{C}_3\text{H}_7\text{OOH}$                                                                                                                                                                                                                                                   | $k_{\text{Pr02\_H02}}$                                                                 | Atkinson (1997)*              |
| G4305 | TrGNC  | $\text{C}_3\text{H}_7\text{O}_2 + \text{NO} \rightarrow .96 \text{CH}_3\text{COCH}_3 + .96 \text{HO}_2 + .96 \text{NO}_2 + .04 \text{C}_3\text{H}_7\text{ONO}_2$                                                                                                                                                                            | $k_{\text{Pr02\_NO}}$                                                                  | Atkinson et al. (1999)*       |
| G4306 | TrGC   | $\text{C}_3\text{H}_7\text{O}_2 + \text{CH}_3\text{O}_2 \rightarrow \text{CH}_3\text{COCH}_3 + .8 \text{HCHO} + .8 \text{HO}_2 + .2 \text{CH}_3\text{OH}$                                                                                                                                                                                   | $k_{\text{Pr02\_CH302}}$                                                               | Kirchner and Stockwell (1996) |
| G4307 | TrGC   | $\text{C}_3\text{H}_7\text{OOH} + \text{OH} \rightarrow .3 \text{C}_3\text{H}_7\text{O}_2 + .7 \text{CH}_3\text{COCH}_3 + .7 \text{OH}$                                                                                                                                                                                                     | $k_{\text{CH300H\_OH}}$                                                                | see note                      |
| G4308 | TrGC   | $\text{CH}_3\text{CH}(\text{O}_2)\text{CH}_2\text{OH} + \text{HO}_2 \rightarrow \text{CH}_3\text{CH}(\text{OOH})\text{CH}_2\text{OH}$                                                                                                                                                                                                       | $6.5\text{E-}13*\text{EXP}(650./\text{temp})$                                          | Müller and Brasseur (1995)    |
| G4309 | TrGNC  | $\text{CH}_3\text{CH}(\text{O}_2)\text{CH}_2\text{OH} + \text{NO} \rightarrow .98 \text{CH}_3\text{CHO} + .98 \text{HCHO} + .98 \text{HO}_2 + .98 \text{NO}_2 + .02 \text{ONIT}$                                                                                                                                                            | $4.2\text{E-}12*\text{EXP}(180./\text{temp})$                                          | Müller and Brasseur (1995)*   |
| G4310 | TrGC   | $\text{CH}_3\text{CH}(\text{OOH})\text{CH}_2\text{OH} + \text{OH} \rightarrow .5 \text{CH}_3\text{CH}(\text{O}_2)\text{CH}_2\text{OH} + .5 \text{CH}_3\text{COCH}_2\text{OH} + .5 \text{OH} + \text{H}_2\text{O}$                                                                                                                           | $3.8\text{E-}12*\text{EXP}(200./\text{temp})$                                          | Müller and Brasseur (1995)    |
| G4311 | TrGC   | $\text{CH}_3\text{COCH}_3 + \text{OH} \rightarrow \text{CH}_3\text{COCH}_2\text{O}_2 + \text{H}_2\text{O}$                                                                                                                                                                                                                                  | $1.33\text{E-}13+3.82\text{E-}11*\text{EXP}(-2000./\text{temp})$                       | Sander et al. (2003)          |
| G4312 | TrGC   | $\text{CH}_3\text{COCH}_2\text{O}_2 + \text{HO}_2 \rightarrow \text{CH}_3\text{COCH}_2\text{O}_2\text{H}$                                                                                                                                                                                                                                   | $8.6\text{E-}13*\text{EXP}(700./\text{temp})$                                          | Tyndall et al. (2001)         |
| G4313 | TrGNC  | $\text{CH}_3\text{COCH}_2\text{O}_2 + \text{NO} \rightarrow \text{NO}_2 + \text{CH}_3\text{C(O)OO} + \text{HCHO}$                                                                                                                                                                                                                           | $2.9\text{E-}12*\text{EXP}(300./\text{temp})$                                          | Sander et al. (2003)          |
| G4314 | TrGC   | $\text{CH}_3\text{COCH}_2\text{O}_2 + \text{CH}_3\text{O}_2 \rightarrow .5 \text{CH}_3\text{COCHO} + .5 \text{CH}_3\text{OH} + .3 \text{CH}_3\text{C(O)OO} + .8 \text{HCHO} + .3 \text{HO}_2 + .2 \text{CH}_3\text{COCH}_2\text{OH}$                                                                                                        | $7.5\text{E-}13*\text{EXP}(500./\text{temp})$                                          | Tyndall et al. (2001)         |
| G4315 | TrGC   | $\text{CH}_3\text{COCH}_2\text{O}_2\text{H} + \text{OH} \rightarrow .3 \text{CH}_3\text{COCH}_2\text{O}_2 + .7 \text{CH}_3\text{COCHO} + .7 \text{OH}$                                                                                                                                                                                      | $k_{\text{CH300H\_OH}}$                                                                | see note                      |
| G4316 | TrGC   | $\text{CH}_3\text{COCH}_2\text{OH} + \text{OH} \rightarrow \text{CH}_3\text{COCHO} + \text{HO}_2$                                                                                                                                                                                                                                           | $3.\text{E-}12$                                                                        | Atkinson et al. (1999)        |
| G4317 | TrGC   | $\text{CH}_3\text{COCHO} + \text{OH} \rightarrow \text{CH}_3\text{C(O)OO} + \text{CO}$                                                                                                                                                                                                                                                      | $8.4\text{E-}13*\text{EXP}(830./\text{temp})$                                          | Tyndall et al. (1995)         |
| G4318 | TrGNC  | $\text{MPAN} + \text{OH} \rightarrow \text{CH}_3\text{COCH}_2\text{OH} + \text{NO}_2$                                                                                                                                                                                                                                                       | $3.2\text{E-}11$                                                                       | Orlando et al. (2002)         |
| G4319 | TrGNC  | $\text{MPAN} \rightarrow \text{MVKO}_2 + \text{NO}_2$                                                                                                                                                                                                                                                                                       | $k_{\text{PAN\_M}}$                                                                    | see note                      |
| G4320 | TrGNC  | $\text{C}_3\text{H}_7\text{ONO}_2 + \text{OH} \rightarrow \text{CH}_3\text{COCH}_3 + \text{NO}_2$                                                                                                                                                                                                                                           | $6.2\text{E-}13*\text{EXP}(-230./\text{temp})$                                         | Atkinson et al. (1999)        |
| G4400 | TrGC   | $\text{C}_4\text{H}_{10} + \text{OH} \rightarrow \text{C}_4\text{H}_9\text{O}_2 + \text{H}_2\text{O}$                                                                                                                                                                                                                                       | $1.81\text{E-}17*\text{temp}*\text{temp}*\text{EXP}(114./\text{temp})$                 | Atkinson (2003)               |
| G4401 | TrGC   | $\text{C}_4\text{H}_9\text{O}_2 + \text{CH}_3\text{O}_2 \rightarrow .88 \text{CH}_3\text{COC}_2\text{H}_5 + .68 \text{HCHO} + 1.23 \text{HO}_2 + .12 \text{CH}_3\text{CHO} + .12 \text{C}_2\text{H}_5\text{O}_2 + .18 \text{CH}_3\text{OH}$                                                                                                 | $k_{\text{Pr02\_CH302}}$                                                               | see note                      |
| G4402 | TrGC   | $\text{C}_4\text{H}_9\text{O}_2 + \text{HO}_2 \rightarrow \text{C}_4\text{H}_9\text{OOH}$                                                                                                                                                                                                                                                   | $k_{\text{Pr02\_H02}}$                                                                 | see note                      |

Table 1: Gas phase reactions (... continued)

| #     | labels | reaction                                                                                                                                                                                                                                                      | rate coefficient                                                                                           | reference               |
|-------|--------|---------------------------------------------------------------------------------------------------------------------------------------------------------------------------------------------------------------------------------------------------------------|------------------------------------------------------------------------------------------------------------|-------------------------|
| G4403 | TrGNC  | $\text{C}_4\text{H}_9\text{O}_2 + \text{NO} \rightarrow .84 \text{NO}_2 + .56 \text{CH}_3\text{COC}_2\text{H}_5 + .56 \text{HO}_2$<br>$+ .28 \text{C}_2\text{H}_5\text{O}_2 + .84 \text{CH}_3\text{CHO} + .16 \text{ONIT}$                                    | k_Pr02_N0                                                                                                  | see note                |
| G4404 | TrGC   | $\text{C}_4\text{H}_9\text{OOH} + \text{OH} \rightarrow .15 \text{C}_4\text{H}_9\text{O}_2 + .85 \text{CH}_3\text{COC}_2\text{H}_5 + .85$<br>$\text{OH} + .85 \text{H}_2\text{O}$                                                                             | k_CH300H_OH                                                                                                | see note                |
| G4405 | TrGC   | $\text{MVK} + \text{O}_3 \rightarrow .45 \text{HCOOH} + .9 \text{CH}_3\text{COCHO} + .1$<br>$\text{CH}_3\text{C(O)OO} + .19 \text{OH} + .22 \text{CO} + .32 \text{HO}_2$                                                                                      | $.5*(1.36\text{E-}15*\text{EXP}(-2112./\text{temp})$<br>$+7.51\text{E-}16*\text{EXP}(-1521./\text{temp}))$ | Pöschl et al. (2000)    |
| G4406 | TrGC   | $\text{MVK} + \text{OH} \rightarrow \text{MVKO2}$                                                                                                                                                                                                             | $.5*(4.1\text{E-}12*\text{EXP}(452./\text{temp})$<br>$+1.9\text{E-}11*\text{EXP}(175./\text{temp}))$       | Pöschl et al. (2000)    |
| G4407 | TrGC   | $\text{MVKO2} + \text{HO}_2 \rightarrow \text{MVKOOH}$                                                                                                                                                                                                        | $1.82\text{E-}13*\text{EXP}(1300./\text{temp})$                                                            | Pöschl et al. (2000)    |
| G4408 | TrGNC  | $\text{MVKO2} + \text{NO} \rightarrow \text{NO}_2 + .25 \text{CH}_3\text{C(O)OO} + .25$<br>$\text{CH}_3\text{COCH}_2\text{OH} + .75 \text{HCHO} + .25 \text{CO} + .75 \text{HO}_2 + .5$<br>$\text{CH}_3\text{COCHO}$                                          | $2.54\text{E-}12*\text{EXP}(360./\text{temp})$                                                             | Pöschl et al. (2000)    |
| G4409 | TrGNC  | $\text{MVKO2} + \text{NO}_2 \rightarrow \text{MPAN}$                                                                                                                                                                                                          | $.25*k\_3\text{rd}(\text{temp}, \text{cair}, 9.7\text{E-}29, 5.6,$<br>$9.3\text{E-}12, 1.5, 0.6)$          | Pöschl et al. (2000)*   |
| G4410 | TrGC   | $\text{MVKO2} + \text{CH}_3\text{O}_2 \rightarrow .5 \text{CH}_3\text{COCHO} + .375$<br>$\text{CH}_3\text{COCH}_2\text{OH} + .125 \text{CH}_3\text{C(O)OO} + 1.125 \text{HCHO}$<br>$+ .875 \text{HO}_2 + .125 \text{CO} + .25 \text{CH}_3\text{OH}$           | $2\text{E-}12$                                                                                             | von Kuhlmann (2001)     |
| G4411 | TrGC   | $\text{MVKO2} + \text{MVKO2} \rightarrow \text{CH}_3\text{COCH}_2\text{OH} + \text{CH}_3\text{COCHO} +$<br>$.5 \text{CO} + .5 \text{HCHO} + \text{HO}_2$                                                                                                      | $2\text{E-}12$                                                                                             | Pöschl et al. (2000)    |
| G4412 | TrGC   | $\text{MVKOOH} + \text{OH} \rightarrow \text{MVKO2}$                                                                                                                                                                                                          | $3\text{E-}11$                                                                                             | Pöschl et al. (2000)    |
| G4413 | TrGC   | $\text{CH}_3\text{COC}_2\text{H}_5 + \text{OH} \rightarrow \text{MEKO2}$                                                                                                                                                                                      | $1.3\text{E-}12*\text{EXP}(-25./\text{temp})$                                                              | Atkinson et al. (1999)  |
| G4414 | TrGC   | $\text{MEKO2} + \text{HO}_2 \rightarrow \text{MEKOOH}$                                                                                                                                                                                                        | k_Pr02_H02                                                                                                 | see note                |
| G4415 | TrGNC  | $\text{MEKO2} + \text{NO} \rightarrow .985 \text{CH}_3\text{CHO} + .985 \text{CH}_3\text{C(O)OO} +$<br>$.985 \text{NO}_2 + .015 \text{ONIT}$                                                                                                                  | k_Pr02_N0                                                                                                  | see note                |
| G4416 | TrGC   | $\text{MEKOOH} + \text{OH} \rightarrow .8 \text{MeCOCO} + .8 \text{OH} + .2 \text{MEKO2}$                                                                                                                                                                     | k_CH300H_OH                                                                                                | see note                |
| G4417 | TrGNC  | $\text{ONIT} + \text{OH} \rightarrow \text{CH}_3\text{COC}_2\text{H}_5 + \text{NO}_2 + \text{H}_2\text{O}$                                                                                                                                                    | $1.7\text{E-}12$                                                                                           | Atkinson et al. (1999)* |
| G4500 | TrGC   | $\text{ISOP} + \text{O}_3 \rightarrow .28 \text{HCOOH} + .65 \text{MVK} + .1 \text{MVKO2} +$<br>$.1 \text{CH}_3\text{C(O)OO} + .14 \text{CO} + .58 \text{HCHO} + .09 \text{H}_2\text{O}_2 + .08$<br>$\text{CH}_3\text{O}_2 + .25 \text{OH} + .25 \text{HO}_2$ | $7.86\text{E-}15*\text{EXP}(-1913./\text{temp})$                                                           | Pöschl et al. (2000)    |
| G4501 | TrGC   | $\text{ISOP} + \text{OH} \rightarrow \text{ISO2}$                                                                                                                                                                                                             | $2.54\text{E-}11*\text{EXP}(410./\text{temp})$                                                             | Pöschl et al. (2000)    |
| G4502 | TrGNC  | $\text{ISOP} + \text{NO}_3 \rightarrow \text{ISON}$                                                                                                                                                                                                           | $3.03\text{E-}12*\text{EXP}(-446./\text{temp})$                                                            | Pöschl et al. (2000)    |
| G4503 | TrGC   | $\text{ISO2} + \text{HO}_2 \rightarrow \text{ISOOH}$                                                                                                                                                                                                          | $2.22\text{E-}13*\text{EXP}(1300./\text{temp})$                                                            | Boyd et al. (2003)*     |
| G4504 | TrGNC  | $\text{ISO2} + \text{NO} \rightarrow .88 \text{NO}_2 + .88 \text{MVK} + .88 \text{HCHO} + .88$<br>$\text{HO}_2 + .12 \text{ISON}$                                                                                                                             | $2.54\text{E-}12*\text{EXP}(360./\text{temp})$                                                             | Pöschl et al. (2000)*   |

Table 1: Gas phase reactions (... continued)

| #      | labels   | reaction                                                                                                                                                                                                | rate coefficient                                                                         | reference              |
|--------|----------|---------------------------------------------------------------------------------------------------------------------------------------------------------------------------------------------------------|------------------------------------------------------------------------------------------|------------------------|
| G4505  | TrGC     | $\text{ISO}_2 + \text{CH}_3\text{O}_2 \rightarrow .5 \text{ MVK} + 1.25 \text{ HCHO} + \text{HO}_2 + .25 \text{ CH}_3\text{COCHO} + .25 \text{ CH}_3\text{COCH}_2\text{OH} + .25 \text{ CH}_3\text{OH}$ | 2.E-12                                                                                   | von Kuhlmann (2001)    |
| G4506  | TrGC     | $\text{ISO}_2 + \text{ISO}_2 \rightarrow 2 \text{ MVK} + \text{HCHO} + \text{HO}_2$                                                                                                                     | 2.E-12                                                                                   | Pöschl et al. (2000)   |
| G4507  | TrGC     | $\text{ISOOH} + \text{OH} \rightarrow \text{MVK} + \text{OH}$                                                                                                                                           | 1.E-10                                                                                   | Pöschl et al. (2000)   |
| G4508  | TrGNC    | $\text{ISON} + \text{OH} \rightarrow \text{CH}_3\text{COCH}_2\text{OH} + \text{NACA}$                                                                                                                   | 1.3E-11                                                                                  | Pöschl et al. (2000)   |
| G6100  | StTrGCl  | $\text{Cl} + \text{O}_3 \rightarrow \text{ClO}$                                                                                                                                                         | $2.3\text{E-}11 \cdot \text{EXP}(-200./\text{temp})$                                     | Sander et al. (2003)   |
| G6101  | StGCl    | $\text{ClO} + \text{O}(^3\text{P}) \rightarrow \text{Cl}$                                                                                                                                               | $3.\text{E-}11 \cdot \text{EXP}(70./\text{temp})$                                        | Sander et al. (2003)   |
| G6102  | StTrGCl  | $\text{ClO} + \text{ClO} \rightarrow \text{Cl}_2\text{O}_2$                                                                                                                                             | k_ClO_ClO                                                                                | Atkinson et al. (2005) |
| G6103  | StTrGCl  | $\text{Cl}_2\text{O}_2 \rightarrow \text{ClO} + \text{ClO}$                                                                                                                                             | $\text{k\_ClO\_ClO}/(1.27\text{E-}27 \cdot \text{EXP}(8744./\text{temp}))$               | Sander et al. (2003)*  |
| G6200  | StGCl    | $\text{Cl} + \text{H}_2 \rightarrow \text{HCl} + \text{H}$                                                                                                                                              | $3.7\text{E-}11 \cdot \text{EXP}(-2300./\text{temp})$                                    | Sander et al. (2003)   |
| G6201a | StGCl    | $\text{Cl} + \text{HO}_2 \rightarrow \text{HCl}$                                                                                                                                                        | $1.8\text{E-}11 \cdot \text{EXP}(170./\text{temp})$                                      | Sander et al. (2003)   |
| G6201b | StGCl    | $\text{Cl} + \text{HO}_2 \rightarrow \text{ClO} + \text{OH}$                                                                                                                                            | $4.1\text{E-}11 \cdot \text{EXP}(-450./\text{temp})$                                     | Sander et al. (2003)   |
| G6202  | StTrGCl  | $\text{Cl} + \text{H}_2\text{O}_2 \rightarrow \text{HCl} + \text{HO}_2$                                                                                                                                 | $1.1\text{E-}11 \cdot \text{EXP}(-980./\text{temp})$                                     | Sander et al. (2003)   |
| G6203a | StGCl    | $\text{ClO} + \text{OH} \rightarrow \text{Cl} + \text{HO}_2$                                                                                                                                            | $7.4\text{E-}12 \cdot \text{EXP}(270./\text{temp})$                                      | Sander et al. (2003)   |
| G6203b | StGCl    | $\text{ClO} + \text{OH} \rightarrow \text{HCl}$                                                                                                                                                         | $6.\text{E-}13 \cdot \text{EXP}(230./\text{temp})$                                       | Sander et al. (2003)   |
| G6204  | StTrGCl  | $\text{ClO} + \text{HO}_2 \rightarrow \text{HOCl}$                                                                                                                                                      | $2.7\text{E-}12 \cdot \text{EXP}(220./\text{temp})$                                      | Sander et al. (2003)   |
| G6205  | StTrGCl  | $\text{HCl} + \text{OH} \rightarrow \text{Cl} + \text{H}_2\text{O}$                                                                                                                                     | $2.6\text{E-}12 \cdot \text{EXP}(-350./\text{temp})$                                     | Sander et al. (2003)   |
| G6206  | StGCl    | $\text{HOCl} + \text{OH} \rightarrow \text{ClO} + \text{H}_2\text{O}$                                                                                                                                   | $3.\text{E-}12 \cdot \text{EXP}(-500./\text{temp})$                                      | Sander et al. (2003)   |
| G6300  | StTrGNCl | $\text{ClO} + \text{NO} \rightarrow \text{NO}_2 + \text{Cl}$                                                                                                                                            | $6.4\text{E-}12 \cdot \text{EXP}(290./\text{temp})$                                      | Sander et al. (2003)   |
| G6301  | StTrGNCl | $\text{ClO} + \text{NO}_2 \rightarrow \text{ClNO}_3$                                                                                                                                                    | $\text{k\_3rd}(\text{temp}, \text{cair}, 1.8\text{E-}31, 3.4, 1.5\text{E-}11, 1.9, 0.6)$ | Sander et al. (2003)   |
| G6303  | StGNCl   | $\text{ClNO}_3 + \text{O}(^3\text{P}) \rightarrow \text{ClO} + \text{NO}_3$                                                                                                                             | $2.9\text{E-}12 \cdot \text{EXP}(-800./\text{temp})$                                     | Sander et al. (2003)   |
| G6304  | StTrGNCl | $\text{ClNO}_3 + \text{Cl} \rightarrow \text{Cl}_2 + \text{NO}_3$                                                                                                                                       | $6.5\text{E-}12 \cdot \text{EXP}(135./\text{temp})$                                      | Sander et al. (2003)   |
| G6400  | StTrGCl  | $\text{Cl} + \text{CH}_4 \rightarrow \text{HCl} + \text{CH}_3\text{O}_2$                                                                                                                                | $9.6\text{E-}12 \cdot \text{EXP}(-1360./\text{temp})$                                    | Sander et al. (2003)   |
| G6401  | StTrGCl  | $\text{Cl} + \text{HCHO} \rightarrow \text{HCl} + \text{CO} + \text{HO}_2$                                                                                                                              | $8.1\text{E-}11 \cdot \text{EXP}(-30./\text{temp})$                                      | Sander et al. (2003)   |
| G6402  | StTrGCl  | $\text{Cl} + \text{CH}_3\text{OOH} \rightarrow \text{CH}_3\text{O}_2 + \text{HCl}$                                                                                                                      | 5.7E-11                                                                                  | Sander et al. (2003)   |
| G6403  | StTrGCl  | $\text{ClO} + \text{CH}_3\text{O}_2 \rightarrow \text{HO}_2 + \text{Cl} + \text{HCHO}$                                                                                                                  | $3.3\text{E-}12 \cdot \text{EXP}(-115./\text{temp})$                                     | Sander et al. (2003)   |
| G6404  | StGCl    | $\text{CCl}_4 + \text{O}(^1\text{D}) \rightarrow \text{ClO} + 3 \text{ Cl}$                                                                                                                             | 3.3E-10                                                                                  | Sander et al. (2003)   |
| G6405  | StGCl    | $\text{CH}_3\text{Cl} + \text{O}(^1\text{D}) \rightarrow \text{OH} + \text{Cl}$                                                                                                                         | 1.65E-10                                                                                 | Sander et al. (2003)*  |
| G6406  | StGCl    | $\text{CH}_3\text{Cl} + \text{OH} \rightarrow \text{H}_2\text{O} + \text{Cl}$                                                                                                                           | $2.4\text{E-}12 \cdot \text{EXP}(-1250./\text{temp})$                                    | Sander et al. (2003)   |
| G6407  | StGCCl   | $\text{CH}_3\text{CCl}_3 + \text{O}(^1\text{D}) \rightarrow \text{OH} + 3 \text{ Cl}$                                                                                                                   | 3.E-10                                                                                   | Sander et al. (2003)*  |
| G6408  | StTrGCCl | $\text{CH}_3\text{CCl}_3 + \text{OH} \rightarrow \text{H}_2\text{O} + 3 \text{ Cl}$                                                                                                                     | $1.6\text{E-}12 \cdot \text{EXP}(-1520./\text{temp})$                                    | Sander et al. (2003)   |
| G6500  | StGFCl   | $\text{CF}_2\text{Cl}_2 + \text{O}(^1\text{D}) \rightarrow \text{ClO} + \text{Cl}$                                                                                                                      | 1.4E-10                                                                                  | Sander et al. (2003)   |
| G6501  | StGFCl   | $\text{CFCl}_3 + \text{O}(^1\text{D}) \rightarrow \text{ClO} + 2 \text{ Cl}$                                                                                                                            | 2.3E-10                                                                                  | Sander et al. (2003)   |
| G7100  | StTrGBr  | $\text{Br} + \text{O}_3 \rightarrow \text{BrO}$                                                                                                                                                         | $1.7\text{E-}11 \cdot \text{EXP}(-800./\text{temp})$                                     | Sander et al. (2003)   |

Table 1: Gas phase reactions (... continued)

| #      | labels    | reaction                                                                                                                                               | rate coefficient                                                                       | reference               |
|--------|-----------|--------------------------------------------------------------------------------------------------------------------------------------------------------|----------------------------------------------------------------------------------------|-------------------------|
| G7101  | StGBr     | $\text{BrO} + \text{O}(^3\text{P}) \rightarrow \text{Br} + \text{O}_2$                                                                                 | $1.9\text{E-}11*\text{EXP}(230./\text{temp})$                                          | Sander et al. (2003)    |
| G7102a | StTrGBr   | $\text{BrO} + \text{BrO} \rightarrow \text{Br} + \text{Br}$                                                                                            | $2.4\text{E-}12*\text{EXP}(40./\text{temp})$                                           | Sander et al. (2003)    |
| G7102b | StTrGBr   | $\text{BrO} + \text{BrO} \rightarrow \text{Br}_2$                                                                                                      | $2.8\text{E-}14*\text{EXP}(869./\text{temp})$                                          | Sander et al. (2003)    |
| G7200  | StTrGBr   | $\text{Br} + \text{HO}_2 \rightarrow \text{HBr}$                                                                                                       | $1.5\text{E-}11*\text{EXP}(-600./\text{temp})$                                         | Sander et al. (2003)    |
| G7201  | StTrGBr   | $\text{BrO} + \text{HO}_2 \rightarrow \text{HOBr}$                                                                                                     | $3.4\text{E-}12*\text{EXP}(540./\text{temp})$                                          | Sander et al. (2003)    |
| G7202  | StTrGBr   | $\text{HBr} + \text{OH} \rightarrow \text{Br} + \text{H}_2\text{O}$                                                                                    | $1.1\text{E-}11$                                                                       | Sander et al. (2003)    |
| G7203  | StGBr     | $\text{HOBr} + \text{O}(^3\text{P}) \rightarrow \text{OH} + \text{BrO}$                                                                                | $1.2\text{E-}10*\text{EXP}(-430./\text{temp})$                                         | Sander et al. (2003)    |
| G7301  | StTrGNBr  | $\text{BrO} + \text{NO} \rightarrow \text{Br} + \text{NO}_2$                                                                                           | $8.8\text{E-}12*\text{EXP}(260./\text{temp})$                                          | Sander et al. (2003)    |
| G7302  | StTrGNBr  | $\text{BrO} + \text{NO}_2 \rightarrow \text{BrNO}_3$                                                                                                   | $\text{k\_BrO\_NO}_2$                                                                  | Sander et al. (2003)*   |
| G7400  | StTrGBr   | $\text{Br} + \text{HCHO} \rightarrow \text{HBr} + \text{CO} + \text{HO}_2$                                                                             | $1.7\text{E-}11*\text{EXP}(-800./\text{temp})$                                         | Sander et al. (2003)    |
| G7403  | StTrGBr   | $\text{CH}_3\text{Br} + \text{OH} \rightarrow \text{H}_2\text{O} + \text{Br}$                                                                          | $2.35\text{E-}12*\text{EXP}(-1300./\text{temp})$                                       | Sander et al. (2003)    |
| G7603a | StTrGClBr | $\text{BrO} + \text{ClO} \rightarrow \text{Br} + \text{OClO}$                                                                                          | $9.5\text{E-}13*\text{EXP}(550./\text{temp})$                                          | Sander et al. (2003)    |
| G7603b | StTrGClBr | $\text{BrO} + \text{ClO} \rightarrow \text{Br} + \text{Cl}$                                                                                            | $2.3\text{E-}12*\text{EXP}(260./\text{temp})$                                          | Sander et al. (2003)    |
| G7603c | StTrGClBr | $\text{BrO} + \text{ClO} \rightarrow \text{BrCl}$                                                                                                      | $4.1\text{E-}13*\text{EXP}(290./\text{temp})$                                          | Sander et al. (2003)    |
| G9200  | TrGS      | $\text{SO}_2 + \text{OH} \rightarrow \text{H}_2\text{SO}_4 + \text{HO}_2$                                                                              | $\text{k\_3rd}(\text{temp}, \text{cair}, 3.\text{E-}31, 3.3, 1.5\text{E-}12, 0., 0.6)$ | Sander et al. (2003)    |
| G9400a | TrGS      | $\text{DMS} + \text{OH} \rightarrow \text{CH}_3\text{SO}_2 + \text{HCHO}$                                                                              | $1.13\text{E-}11*\text{EXP}(-253./\text{temp})$                                        | Atkinson et al. (2003)* |
| G9400b | TrGS      | $\text{DMS} + \text{OH} \rightarrow \text{DMSO} + \text{HO}_2$                                                                                         | $\text{k\_DMS\_OH}$                                                                    | Atkinson et al. (2003)* |
| G9401  | TrGNS     | $\text{DMS} + \text{NO}_3 \rightarrow \text{CH}_3\text{SO}_2 + \text{HNO}_3 + \text{HCHO}$                                                             | $1.9\text{E-}13*\text{EXP}(520./\text{temp})$                                          | Atkinson et al. (2003)  |
| G9402  | TrGS      | $\text{DMSO} + \text{OH} \rightarrow .6 \text{ SO}_2 + \text{HCHO} + .6 \text{ CH}_3\text{O}_2 + .4 \text{ HO}_2 + .4 \text{ CH}_3\text{SO}_3\text{H}$ | $1.\text{E-}10$                                                                        | Hynes and Wine (1996)   |
| G9403  | TrGS      | $\text{CH}_3\text{SO}_2 \rightarrow \text{SO}_2 + \text{CH}_3\text{O}_2$                                                                               | $1.9\text{E}13*\text{EXP}(-8661./\text{temp})$                                         | Barone et al. (1995)    |
| G9404  | TrGS      | $\text{CH}_3\text{SO}_2 + \text{O}_3 \rightarrow \text{CH}_3\text{SO}_3$                                                                               | $3.\text{E-}13$                                                                        | Barone et al. (1995)    |
| G9405  | TrGS      | $\text{CH}_3\text{SO}_3 + \text{HO}_2 \rightarrow \text{CH}_3\text{SO}_3\text{H}$                                                                      | $5.\text{E-}11$                                                                        | Barone et al. (1995)    |

\*Notes:

Rate coefficients for three-body reactions are defined via the function  $\text{k\_3rd}(T, M, k_0^{300}, n, k_{\text{inf}}^{300}, m, f_c)$ . In the code, the temperature  $T$  is called `temp` and the concentration of “air molecules”  $M$  is called `cair`. Using the auxiliary variables  $k_0(T)$ ,  $k_{\text{inf}}(T)$ , and  $k_{\text{ratio}}$ ,  $\text{k\_3rd}$  is defined as:

$$k_0(T) = k_0^{300} \times \left(\frac{300\text{K}}{T}\right)^n \quad (1)$$

$$k_{\text{inf}}(T) = k_{\text{inf}}^{300} \times \left(\frac{300\text{K}}{T}\right)^m \quad (2)$$

$$k_{\text{ratio}} = \frac{k_0(T)M}{k_{\text{inf}}(T)} \quad (3)$$

$$\text{k\_3rd} = \frac{k_0(T)M}{1 + k_{\text{ratio}}} \times f_c\left(\frac{1}{1 + (\log_{10}(k_{\text{ratio}}))^2}\right) \quad (4)$$

A similar function, called `k_3rd_iupac` here, is used by Atkinson et al. (2005) for three-body reactions. It has

the same function parameters as `k_3rd` and it is defined as:

$$k_0(T) = k_0^{300} \times \left(\frac{300\text{K}}{T}\right)^n \quad (5)$$

$$k_{\text{inf}}(T) = k_{\text{inf}}^{300} \times \left(\frac{300\text{K}}{T}\right)^m \quad (6)$$

$$k_{\text{ratio}} = \frac{k_0(T)M}{k_{\text{inf}}(T)} \quad (7)$$

$$N = 0.75 - 1.27 \times \log_{10}(f_c) \quad (8)$$

$$k_{3rd\_iupac} = \frac{k_0(T)M}{1 + k_{ratio}} \times f_c^{\left(\frac{1}{1 + (\log_{10}(k_{ratio})/N)^2}\right)} \quad (9)$$

G1002: path leading to 2 O(<sup>3</sup>P) + O<sub>2</sub> neglected

G01Diag:  $k_{03s} = (1.7E-12 * \text{EXP}(-940./\text{temp})) * C(\text{KPP\_OH}) + (1.E-14 * \text{EXP}(-490./\text{temp})) * C(\text{KPP\_H02}) + J_{01D} * 2.2E-10 * C(\text{KPP\_H2O}) / (3.2E-11 * \text{EXP}(70./\text{temp}) * C(\text{KPP\_O2}) + 1.8E-11 * \text{EXP}(110./\text{temp}) * C(\text{KPP\_N2}) + 2.2E-10 * C(\text{KPP\_H2O}))$

G2108: branching ratio from Hack et al., see note B5 of Sander et al. (2003)

G2110: The rate coefficient is:  $k_{H02\_H02} = (1.5E-12 * \text{EXP}(19./\text{temp}) + 1.7E-33 * \text{EXP}(1000./\text{temp}) * \text{cair}) * (1. + 1.4E-21 * \text{EXP}(2200./\text{temp}) * C(\text{KPP\_H2O}))$ . The value for the first (pressure-independent) part is from Christensen et al. (2002), the water term from Kircher and Sander (1984)

G3109: The rate coefficient is:  $k_{N03\_N02} = k_{3rd}(\text{temp}, \text{cair}, 2.E-30, 4.4, 1.4E-12, 0.7, 0.6)$ .

G3110: The rate coefficient is defined as backward reaction divided by equilibrium constant.

G3203: The rate coefficient is:  $k_{N02\_H02} = k_{3rd}(\text{temp}, \text{cair}, 1.8E-31, 3.2, 4.7E-12, 1.4, 0.6)$ .

G3206: The rate coefficient is:  $k_{HN03\_OH} = 2.4E-14 * \text{EXP}(460./\text{temp}) + 1./ (1./ (6.5E-34 * \text{EXP}(1335./\text{temp}) * \text{cair}) + 1./ (2.7E-17 * \text{EXP}(2199./\text{temp})))$

G3207: The rate coefficient is defined as backward reaction divided by equilibrium constant.

G4103: product distribution is from Elrod et al. (2001)

G4107: The rate coefficient is:  $k_{CH300H\_OH} = 3.8E-12 * \text{EXP}(200./\text{temp})$

G4109: same temperature dependence assumed as for CH<sub>3</sub>CHO+NO<sub>3</sub>

G4201: product distribution is from von Kuhlmann (2001) (see also Neeb et al. (1998))

G4206: Rate coefficient calculated by von Kuhlmann (pers. comm. 2004) using self reactions of CH<sub>3</sub>OO and C<sub>2</sub>H<sub>5</sub>OO from Sander et al. (2003) and geometric mean as suggested by Madronich and Calvert (1990) and Kirchner and Stockwell (1996). The product distribution (branching=0.5/0.25/0.25) is calculated by von Kuhlmann (pers. comm. 2004) based on Villenave and Lesclaux (1996) and Tyndall et al. (2001).

G4207: same value as for G4107: CH<sub>3</sub>OOH+OH assumed

G4213: The rate coefficient is:  $k_{PA\_N02} = k_{3rd}(\text{temp}, \text{cair}, 8.5E-29, 6.5, 1.1E-11, 1., 0.6)$ .

G4216: 1.0E-11 from Atkinson et al. (1999), temperature dependence from Kirchner and Stockwell (1996)

G4218: same value as for G4107: CH<sub>3</sub>OOH+OH assumed

G4219: according to Pöschl et al. (2000), the same value as for CH<sub>3</sub>CHO+OH can be assumed

G4220: 50% of the upper limit given by Sander et al. (2003), as suggested by von Kuhlmann (2001)

G4221: The rate coefficient is:  $k_{PAN\_M} = k_{PA\_N02} / 9.E-29 * \text{EXP}(-14000./\text{temp})$ , i.e. the rate coefficient is defined as backward reaction divided by equilibrium constant.

G4301: product distribution is for terminal olefin carbons from Zaveri and Peters (1999)

G4304: The rate coefficient is:  $k_{Pr02\_H02} = 1.9E-13 * \text{EXP}(1300./\text{temp})$ . Value for generic RO<sub>2</sub> + HO<sub>2</sub> reaction from Atkinson (1997) is used.

G4305: The rate coefficient is:  $k_{Pr02\_N0} = 2.7E-12 * \text{EXP}(360./\text{temp})$

G4306: The rate coefficient is:  $k_{Pr02\_CH302} = 9.46E-14 * \text{EXP}(431./\text{temp})$ . The product distribution is from von Kuhlmann (2001).

G4307: same value as for G4107: CH<sub>3</sub>OOH+OH assumed

G4309: products are from von Kuhlmann (2001)

G4315: same value as for G4107: CH<sub>3</sub>OOH+OH assumed

G4319: same value as for PAN assumed

G4401: same value as for propyl group assumed ( $k_{Pr02\_CH302}$ )

G4402: same value as for propyl group assumed ( $k_{Pr02\_H02}$ )

G4403: same value as for propyl group assumed ( $k_{Pr02\_N0}$ )

G4404: same value as for G4107: CH<sub>3</sub>OOH+OH assumed

G4409: The factor 0.25 was recommended by Uli Poeschl (pers. comm. 2004).

G4414: same value as for propyl group assumed ( $k_{Pr02\_H02}$ )

G4415: same value as for propyl group assumed ( $k_{Pr02\_N0}$ )

G4416: same value as for G4107: CH<sub>3</sub>OOH+OH assumed

G4417: value for C<sub>4</sub>H<sub>9</sub>ONO<sub>2</sub> used here

G4503: same temperature dependence assumed as for other RO<sub>2</sub>+HO<sub>2</sub> reactions

G4504: Yield of 12 % RONO<sub>2</sub> assumed as suggested in Table 2 of Sprengnether et al. (2002).



G6102: The rate coefficient is:  $k_{C10\_C10} = k_{3rd\_iupac}(temp, cair, 2.E-32, 4., 1.E-11, 0., 0.45)$ .

G6103: The rate coefficient is defined as backward reaction divided by equilibrium constant.

G6204: At low temperatures, there may be a minor reaction channel leading to  $O_3 + HCl$ . See Finkbeiner et al. (1995) for details. It is neglected here.

G6405: average of reactions with  $CH_3Br$  and  $CH_3F$  (B. Steil, pers. comm., see also note A15 in Sander et al. (2003)).

G6407: extrapolated from reactions with  $CH_3CF_3$ ,  $CH_3CClF_2$ , and  $CH_3CCl_2F$  (B. Steil, pers. comm., see also note A15 in Sander et al. (2003)).

G7302: The rate coefficient is:  $k_{BrO\_NO2} = k_{3rd}(temp, cair, 5.2E-31, 3.2, 6.9E-12, 2.9, 0.6)$ .

G8101: This value was assumed by Jimenez et al. (2003).

G9400a: Abstraction path. The assumed reaction sequence (omitting  $H_2O$  and  $O_2$  as products) according to Yin et al. (1990) is:

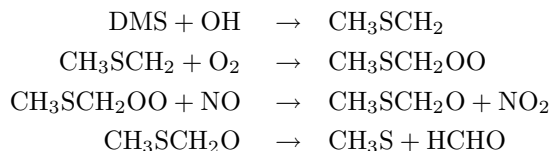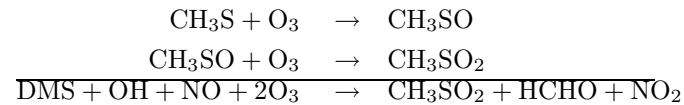

Neglecting the effect on  $O_3$  and  $NO_x$ , the remaining reaction is:

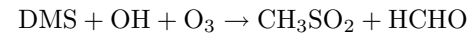

G9400b: Addition path. The rate coefficient is:  $k_{DMS\_OH} = 1.0E-39 * EXP(5820./temp) * C(KPP\_02) / (1.+5.0E-30 * EXP(6280./temp) * C(KPP\_02))$ .

Table 2: Photolysis reactions

| #      | labels  | reaction                                                                                                                                                                                 | rate coefficient             | reference |
|--------|---------|------------------------------------------------------------------------------------------------------------------------------------------------------------------------------------------|------------------------------|-----------|
| J1000  | StGJ    | $\text{O}_2 + h\nu \rightarrow \text{O}(^3\text{P}) + \text{O}(^3\text{P})$                                                                                                              | J_02                         | see note  |
| J1001a | StTrGJ  | $\text{O}_3 + h\nu \rightarrow \text{O}(^1\text{D})$                                                                                                                                     | J_01D                        | see note  |
| J1001b | StTrGJ  | $\text{O}_3 + h\nu \rightarrow \text{O}(^3\text{P})$                                                                                                                                     | J_03P                        | see note  |
| J2100  | StGJ    | $\text{H}_2\text{O} + h\nu \rightarrow \text{H} + \text{OH}$                                                                                                                             | J_H2O                        | see note  |
| J2101  | StTrGJ  | $\text{H}_2\text{O}_2 + h\nu \rightarrow 2 \text{OH}$                                                                                                                                    | J_H2O2                       | see note  |
| J3100  | StGNJ   | $\text{N}_2\text{O} + h\nu \rightarrow \text{O}(^1\text{D})$                                                                                                                             | J_N2O                        | see note  |
| J3101  | StTrGNJ | $\text{NO}_2 + h\nu \rightarrow \text{NO} + \text{O}(^3\text{P})$                                                                                                                        | J_N02                        | see note  |
| J3102  | StGNJ   | $\text{NO} + h\nu \rightarrow \text{N} + \text{O}(^3\text{P})$                                                                                                                           | J_N0                         | see note  |
| J3103a | StTrGNJ | $\text{NO}_3 + h\nu \rightarrow \text{NO}_2 + \text{O}(^3\text{P})$                                                                                                                      | J_N020                       | see note  |
| J3103b | StTrGNJ | $\text{NO}_3 + h\nu \rightarrow \text{NO}$                                                                                                                                               | J_N002                       | see note  |
| J3104  | StTrGNJ | $\text{N}_2\text{O}_5 + h\nu \rightarrow \text{NO}_2 + \text{NO}_3$                                                                                                                      | J_N205                       | see note  |
| J3200  | TrGJ    | $\text{HONO} + h\nu \rightarrow \text{NO} + \text{OH}$                                                                                                                                   | J_HONO                       | see note  |
| J3201  | StTrGNJ | $\text{HNO}_3 + h\nu \rightarrow \text{NO}_2 + \text{OH}$                                                                                                                                | J_HNO3                       | see note  |
| J3202  | StTrGNJ | $\text{HNO}_4 + h\nu \rightarrow .667 \text{NO}_2 + .667 \text{HO}_2 + .333 \text{NO}_3 + .333 \text{OH}$                                                                                | J_HNO4                       | see note  |
| J4100  | StTrGJ  | $\text{CH}_3\text{OOH} + h\nu \rightarrow \text{HCHO} + \text{OH} + \text{HO}_2$                                                                                                         | J_CH300H                     | see note  |
| J4101a | StTrGJ  | $\text{HCHO} + h\nu \rightarrow \text{H}_2 + \text{CO}$                                                                                                                                  | J_COH2                       | see note  |
| J4101b | StTrGJ  | $\text{HCHO} + h\nu \rightarrow \text{H} + \text{CO} + \text{HO}_2$                                                                                                                      | J_CHOH                       | see note  |
| J4102  | StGJ    | $\text{CO}_2 + h\nu \rightarrow \text{CO} + \text{O}(^3\text{P})$                                                                                                                        | J_CO2                        | see note  |
| J4200  | TrGCJ   | $\text{C}_2\text{H}_5\text{OOH} + h\nu \rightarrow \text{CH}_3\text{CHO} + \text{HO}_2 + \text{OH}$                                                                                      | J_CH300H                     | see note  |
| J4201  | TrGCJ   | $\text{CH}_3\text{CHO} + h\nu \rightarrow \text{CH}_3\text{O}_2 + \text{HO}_2 + \text{CO}$                                                                                               | J_CH3CHO                     | see note  |
| J4202  | TrGCJ   | $\text{CH}_3\text{C}(\text{O})\text{OOH} + h\nu \rightarrow \text{CH}_3\text{O}_2 + \text{OH}$                                                                                           | J_PAA                        | see note  |
| J4203  | TrGNJCJ | $\text{NACA} + h\nu \rightarrow \text{NO}_2 + \text{HCHO} + \text{CO}$                                                                                                                   | 0.19*J_CHOH                  | see note  |
| J4204  | TrGNJCJ | $\text{PAN} + h\nu \rightarrow \text{CH}_3\text{C}(\text{O})\text{OO} + \text{NO}_2$                                                                                                     | J_PAN                        | see note  |
| J4300  | TrGCJ   | $\text{C}_3\text{H}_7\text{OOH} + h\nu \rightarrow \text{CH}_3\text{COCH}_3 + \text{HO}_2 + \text{OH}$                                                                                   | J_CH300H                     | see note  |
| J4301  | TrGCJ   | $\text{CH}_3\text{COCH}_3 + h\nu \rightarrow \text{CH}_3\text{C}(\text{O})\text{OO} + \text{CH}_3\text{O}_2$                                                                             | J_CH3COCH3                   | see note  |
| J4302  | TrGCJ   | $\text{CH}_3\text{COCH}_2\text{OH} + h\nu \rightarrow \text{CH}_3\text{C}(\text{O})\text{OO} + \text{HCHO} + \text{HO}_2$                                                                | 0.074*J_CHOH                 | see note  |
| J4303  | TrGCJ   | $\text{CH}_3\text{COCHO} + h\nu \rightarrow \text{CH}_3\text{C}(\text{O})\text{OO} + \text{CO} + \text{HO}_2$                                                                            | J_CH3COCHO                   | see note  |
| J4304  | TrGCJ   | $\text{CH}_3\text{COCH}_2\text{O}_2\text{H} + h\nu \rightarrow \text{CH}_3\text{C}(\text{O})\text{OO} + \text{HO}_2 + \text{OH}$                                                         | J_CH300H                     | see note  |
| J4305  | TrGNJCJ | $\text{MPAN} + h\nu \rightarrow \text{CH}_3\text{COCH}_2\text{OH} + \text{NO}_2$                                                                                                         | J_PAN                        | see note  |
| J4306  | TrGNJCJ | $\text{C}_3\text{H}_7\text{ONO}_2 + h\nu \rightarrow \text{CH}_3\text{COCH}_3 + \text{NO}_2 + \text{HO}_2$                                                                               | 3.7*J_PAN                    | see note  |
| J4400  | TrGCJ   | $\text{C}_4\text{H}_9\text{OOH} + h\nu \rightarrow \text{OH} + .67 \text{CH}_3\text{COC}_2\text{H}_5 + .67 \text{HO}_2 + .33 \text{C}_2\text{H}_5\text{O}_2 + .33 \text{CH}_3\text{CHO}$ | J_CH300H                     | see note  |
| J4401  | TrGCJ   | $\text{MVK} + h\nu \rightarrow \text{CH}_3\text{C}(\text{O})\text{OO} + \text{HCHO} + \text{CO} + \text{HO}_2$                                                                           | 0.019*J_COH2+.015*J_CH3COCHO | see note  |

Table 2: Photolysis reactions (... continued)

| #     | labels     | reaction                                                                                                                                                                                 | rate coefficient | reference |
|-------|------------|------------------------------------------------------------------------------------------------------------------------------------------------------------------------------------------|------------------|-----------|
| J4402 | TrGCJ      | MVKOOH + $h\nu$ → OH + .5 CH <sub>3</sub> COCHO + .25 CH <sub>3</sub> COCH <sub>2</sub> OH + .75 HCHO + .75 HO <sub>2</sub> + .25 CH <sub>3</sub> C(O)OO + .25 CO                        | J_CH300H         | see note  |
| J4403 | TrGCJ      | CH <sub>3</sub> COC <sub>2</sub> H <sub>5</sub> + $h\nu$ → CH <sub>3</sub> C(O)OO + C <sub>2</sub> H <sub>5</sub> O <sub>2</sub>                                                         | 0.42*J_CHOH      | see note  |
| J4404 | TrGCJ      | MEKOOH + $h\nu$ → CH <sub>3</sub> C(O)OO + CH <sub>3</sub> CHO + OH                                                                                                                      | J_CH300H         | see note  |
| J4405 | TrGCJ      | MeCOCO + $h\nu$ → 2 CH <sub>3</sub> C(O)OO                                                                                                                                               | 2.15*J_CH3COCHO  | see note  |
| J4406 | TrGN CJ    | ONIT + $h\nu$ → NO <sub>2</sub> + .67 CH <sub>3</sub> COC <sub>2</sub> H <sub>5</sub> + .67 HO <sub>2</sub> + .33 C <sub>2</sub> H <sub>5</sub> O <sub>2</sub> + .33 CH <sub>3</sub> CHO | 3.7*J_PAN        | see note  |
| J4500 | TrGCJ      | ISOOH + $h\nu$ → MVK + HCHO + HO <sub>2</sub> + OH                                                                                                                                       | J_CH300H         | see note  |
| J4501 | TrGN CJ    | ISON + $h\nu$ → MVK + HCHO + NO <sub>2</sub> + HO <sub>2</sub>                                                                                                                           | 3.7*J_PAN        | see note  |
| J6000 | StTrGClJ   | Cl <sub>2</sub> + $h\nu$ → Cl + Cl                                                                                                                                                       | J_Cl2            | see note  |
| J6100 | StTrGClJ   | Cl <sub>2</sub> O <sub>2</sub> + $h\nu$ → 2 Cl                                                                                                                                           | 1.4*J_Cl202      | see note  |
| J6101 | StTrGClJ   | OCIO + $h\nu$ → ClO + O( <sup>3</sup> P)                                                                                                                                                 | J_OC10           | see note  |
| J6200 | StGClJ     | HCl + $h\nu$ → Cl + H                                                                                                                                                                    | J_HCl            | see note  |
| J6201 | StTrGClJ   | HOCl + $h\nu$ → OH + Cl                                                                                                                                                                  | J_HOCl           | see note  |
| J6301 | StTrGNClJ  | ClNO <sub>3</sub> + $h\nu$ → Cl + NO <sub>3</sub>                                                                                                                                        | J_Cl1NO3         | see note  |
| J6400 | StGClJ     | CH <sub>3</sub> Cl + $h\nu$ → Cl + CH <sub>3</sub> O <sub>2</sub>                                                                                                                        | J_CH3Cl          | see note  |
| J6401 | StGClJ     | CCl <sub>4</sub> + $h\nu$ → 4 Cl                                                                                                                                                         | J_CC14           | see note  |
| J6402 | StGCClJ    | CH <sub>3</sub> CCl <sub>3</sub> + $h\nu$ → 3 Cl                                                                                                                                         | J_CH3CC13        | see note  |
| J6500 | StGFClJ    | CFCl <sub>3</sub> + $h\nu$ → 3 Cl                                                                                                                                                        | J_CFC13          | see note  |
| J6501 | StGFClJ    | CF <sub>2</sub> Cl <sub>2</sub> + $h\nu$ → 2 Cl                                                                                                                                          | J_CF2Cl2         | see note  |
| J7000 | StTrGBrJ   | Br <sub>2</sub> + $h\nu$ → Br + Br                                                                                                                                                       | J_Br2            | see note  |
| J7200 | StTrGBrJ   | HOBr + $h\nu$ → Br + OH                                                                                                                                                                  | J_HOBr           | see note  |
| J7301 | StTrGNBrJ  | BrNO <sub>3</sub> + $h\nu$ → Br + NO <sub>3</sub>                                                                                                                                        | J_BrNO3          | see note  |
| J7400 | StGBrJ     | CH <sub>3</sub> Br + $h\nu$ → Br + CH <sub>3</sub> O <sub>2</sub>                                                                                                                        | J_CH3Br          | see note  |
| J7500 | StGFBrJ    | CF <sub>3</sub> Br + $h\nu$ → Br                                                                                                                                                         | J_CF3Br          | see note  |
| J7600 | StTrGClBrJ | BrCl + $h\nu$ → Br + Cl                                                                                                                                                                  | J_BrCl           | see note  |
| J7601 | StGFBrJ    | CF <sub>2</sub> ClBr + $h\nu$ → Br + Cl                                                                                                                                                  | J_CF2ClBr        | see note  |

\*Notes: J-values are calculated with an external module and then supplied to the MECCA chemistry

J6100: Stimpfle et al. (2004) claim that the combination of absorption cross sections from Burkholder et al. (1990) and the Cl<sub>2</sub>O<sub>2</sub> formation rate coefficient by Sander et al. (2003) can approximately reproduce the observed Cl<sub>2</sub>O<sub>2</sub>/ClO ratios and ozone depletion. They give an almost zenith-angle independent ratio of 1.4 for Burkholder et al. (1990) to Sander et al. (2003) J-values. The IUPAC recommendation for the Cl<sub>2</sub>O<sub>2</sub> formation rate is about 5 to 15 % less than the value by Sander et al. (2003) but more than 20 % larger than the value by Sander et al. (2000). The J-values by Burkholder et al. (1990) are within the uncertainty range of the IUPAC recommendation.

Table 3: PSC reactions

| #      | labels     | reaction                                                                            | rate coefficient | reference |
|--------|------------|-------------------------------------------------------------------------------------|------------------|-----------|
| PSC200 | StPscN     | $\text{N}_2\text{O}_5 + \text{H}_2\text{O} \rightarrow \text{HNO}_3 + \text{HNO}_3$ | khet_N2O5_H2O    | see note  |
| PSC410 | StPscCl    | $\text{HOCl} + \text{HCl} \rightarrow \text{Cl}_2 + \text{H}_2\text{O}$             | khet_HOCl_HCl    | see note  |
| PSC420 | StPscNCl   | $\text{ClNO}_3 + \text{HCl} \rightarrow \text{Cl}_2 + \text{HNO}_3$                 | khet_ClNO3_HCl   | see note  |
| PSC421 | StPscNCl   | $\text{ClNO}_3 + \text{H}_2\text{O} \rightarrow \text{HOCl} + \text{HNO}_3$         | khet_ClNO3_H2O   | see note  |
| PSC510 | StPscBr    | $\text{HOBr} + \text{HBr} \rightarrow \text{Br}_2 + \text{H}_2\text{O}$             | khet_HOBr_HBr    | see note  |
| PSC520 | StPscNBr   | $\text{BrNO}_3 + \text{H}_2\text{O} \rightarrow \text{HOBr} + \text{HNO}_3$         | khet_BrNO3_H2O   | see note  |
| PSC540 | StPscNClBr | $\text{ClNO}_3 + \text{HBr} \rightarrow \text{BrCl} + \text{HNO}_3$                 | khet_ClNO3_HBr   | see note  |
| PSC541 | StPscNClBr | $\text{BrNO}_3 + \text{HCl} \rightarrow \text{BrCl} + \text{HNO}_3$                 | khet_BrNO3_HCl   | see note  |
| PSC542 | StPscClBr  | $\text{HOCl} + \text{HBr} \rightarrow \text{BrCl} + \text{H}_2\text{O}$             | khet_HOCl_HBr    | see note  |
| PSC543 | StPscClBr  | $\text{HOBr} + \text{HCl} \rightarrow \text{BrCl} + \text{H}_2\text{O}$             | khet_HOBr_HCl    | see note  |

\*Notes: PSC reaction rates are calculated with an external module and then supplied to the MECCA chemistry (see <http://www.messy-interface.org> for details)

## References

- Atkinson, R.: Gas-phase tropospheric chemistry of volatile organic compounds: 1. Alkanes and alkenes, *J. Phys. Chem. Ref. Data*, 26, 215–290, 1997.
- Atkinson, R.: Kinetics of the gas-phase reactions of OH radicals with alkanes and cycloalkanes, *Atmos. Chem. Phys.*, 3, 2233–2307, 2003.
- Atkinson, R., Baulch, D. L., Cox, R. A., Hampson, Jr., R. F., Kerr, J. A., Rossi, M. J., and Troe, J.: Summary of evaluated kinetic and photochemical data for atmospheric chemistry: Web version August 1999, <http://www.iupac-kinetic.ch.cam.ac.uk/>, 1999.
- Atkinson, R., Baulch, D. L., Cox, R. A., Crowley, J. N., Hampson, R. F., Hynes, R. G., Jenkin, M. E., Rossi, M. J., and Troe, J.: Evaluated kinetic and photochemical data for atmospheric chemistry: Part 1 - gas phase reactions of O<sub>x</sub>, HO<sub>x</sub>, NO<sub>x</sub> and SO<sub>x</sub> species, *Atmos. Chem. Phys. Discuss.*, 3, 6179–6699, 2003.
- Atkinson, R., Baulch, D. L., Cox, R. A., Crowley, J. N., Hampson, Jr., R. F., Hynes, R. G., Jenkin, M. E., Kerr, J. A., Rossi, M. J., and Troe, J.: Summary of evaluated kinetic and photochemical data for atmospheric chemistry: Web version March 2005, <http://www.iupac-kinetic.ch.cam.ac.uk/>, 2005.
- Barone, S. B., Turnipseed, A. A., and Ravishankara, A. R.: Role of adducts in the atmospheric oxidation of dimethyl sulfide, *Faraday Discuss.*, 100, 39–54, 1995.
- Boyd, A. A., Flaud, P.-M., Daugey, N., and Lesclaux, R.: Rate constants for RO<sub>2</sub> + HO<sub>2</sub> reactions measured under a large excess of HO<sub>2</sub>, *J. Phys. Chem. A*, 107, 818–821, 2003.
- Burkholder, J. B., Orlando, J. J., and Howard, C. J.: Ultraviolet absorption cross sections of Cl<sub>2</sub>O<sub>2</sub> between 210 and 410 nm, *J. Phys. Chem.*, 94, 687–695, 1990.
- Canosa-Mas, C. E., King, M. D., Lopez, R., Percival, C. J., Wayne, R. P., Shallcross, D. E., Pyle, J. A., and Daele, V.: Is the reaction between CH<sub>3</sub>(O)O<sub>2</sub> and NO<sub>3</sub> important in the night-time troposphere?, *J. Chem. Soc. Faraday Trans.*, 92, 2211–2222, 1996.
- Christensen, L. E., Okumura, M., Sander, S. P., Salawitch, R. J., Toon, G. C., Sen, B., Blavier, J.-F., and Jucks, K. W.: Kinetics of HO<sub>2</sub> + HO<sub>2</sub> → H<sub>2</sub>O<sub>2</sub> + O<sub>2</sub>: Implications for stratospheric H<sub>2</sub>O<sub>2</sub>, *Geophys. Res. Lett.*, 29, doi:10.1029/2001GL014525, 2002.
- Elrod, M. J., Ranschaert, D. L., and Schneider, N. J.: Direct kinetics study of the temperature dependence of the CH<sub>2</sub>O branching channel for the CH<sub>3</sub>O<sub>2</sub> + HO<sub>2</sub> reaction, *Int. J. Chem. Kinetics*, 33, 363–376, 2001.
- Finkbeiner, M., Crowley, J. N., Horie, O., Müller, R., Moortgat, G. K., and Crutzen, P. J.: Reaction between HO<sub>2</sub> and ClO: Product formation between 210 and 300 K, *J. Phys. Chem.*, 99, 16 264–16 275, 1995.
- Hynes, A. J. and Wine, P. H.: The atmospheric chemistry of dimethylsulfoxide (DMSO) kinetics and mechanism of the OH + DMSO reaction, *J. Atmos. Chem.*, 24, 23–37, 1996.
- Jimenez, J. L., Bahreini, R., Cocker III, D. R., Zhuang, H., Varutbangkul, V., Flagan, R. C., Seinfeld, J. H., O'Dowd, C. D., and Hoffmann, T.: New particle formation from photooxidation of diiodomethane (CH<sub>2</sub>I<sub>2</sub>), *J. Geophys. Res.*, 108D, doi:10.1029/2002JD002452, 2003.
- Kircher, C. C. and Sander, S. P.: Kinetics and mechanism of HO<sub>2</sub> and DO<sub>2</sub> disproportionations, *J. Phys. Chem.*, 88, 2082–2091, 1984.
- Kirchner, F. and Stockwell, W. R.: Effect of peroxy radical reactions on the predicted concentrations of ozone, nitrogenous compounds, and radicals, *J. Geophys. Res.*, 101D, 21 007–21 022, 1996.
- Madronich, S. and Calvert, J. G.: Permutation reactions of organic peroxy radicals in the troposphere, *J. Geophys. Res.*, 95D, 5697–5715, 1990.
- McCabe, D. C., Gierczak, T., Talukdar, R. K., and Ravishankara, A. R.: Kinetics of the reaction OH + CO under atmospheric conditions, *Geophys. Res. Lett.*, 28, 3135–3138, 2001.
- Müller, J.-F. and Brasseur, G.: IMAGES: A three-dimensional chemical transport model of the global troposphere, *J. Geophys. Res.*, 100D, 16 445–16 490, 1995.
- Neeb, P., Horie, O., and Moortgat, G. K.: The ethene-ozone reaction in the gas phase, *J. Phys. Chem. A*, 102, 6778–6785, 1998.
- Orlando, J. J., Tyndall, G. S., Bertman, S. B., Chen, W., and Burkholder, J. B.: Rate coefficient for the reaction of OH with CH<sub>2</sub>=C(CH<sub>3</sub>)C(O)OONO<sub>2</sub> (MPAN), *Atmos. Environ.*, 36, 1895–1900, 2002.
- Pöschl, U., von Kuhlmann, R., Poisson, N., and Crutzen, P. J.: Development and intercomparison of condensed isoprene oxidation mechanisms for global atmospheric modeling, *J. Atmos. Chem.*, 37, 29–52, 2000.
- Roelofs, G.-J. and Lelieveld, J.: Model study of the influence of cross-tropopause O<sub>3</sub> transports of tropospheric O<sub>3</sub> levels, *Tellus*, 49B, 38–55, 1997.

- Sander, S. P., Friedl, R. R., DeMore, W. B., Golden, D. M., Kurylo, M. J., Hampson, R. F., Huie, R. E., Moortgat, G. K., Ravishankara, A. R., Kolb, C. E., and Molina, M. J.: Chemical kinetics and photochemical data for use in stratospheric modeling. Supplement to evaluation 12: Update of key reactions. Evaluation number 13, JPL Publication 00-3, Jet Propulsion Laboratory, Pasadena, CA, <http://jpldataeval.jpl.nasa.gov/>, 2000.
- Sander, S. P., Finlayson-Pitts, B. J., Friedl, R. R., Golden, D. M., Huie, R. E., Kolb, C. E., Kurylo, M. J., Molina, M. J., Moortgat, G. K., Orkin, V. L., and Ravishankara, A. R.: Chemical Kinetics and Photochemical Data for Use in Atmospheric Studies, Evaluation Number 14, JPL Publication 02-25, Jet Propulsion Laboratory, Pasadena, CA, 2003.
- Sivakumaran, V., Hölscher, D., Dillon, T. J., and Crowley, J. N.: Reaction between OH and HCHO: temperature dependent rate coefficients (202-399 K) and product pathways (298 K), *Phys. Chem. Chem. Phys.*, 5, 4821–4827, 2003.
- Sprengnether, M., Demerjian, K. L., Donahue, N. M., and Anderson, J. G.: Product analysis of the OH oxidation of isoprene and 1,3-butadiene in the presence of NO, *J. Geophys. Res.*, 107D, doi:10.1029/2001JD000716, 2002.
- Stimpfle, R. M., Wilmouth, D. M., Salawitch, R. J., and Anderson, J. G.: First measurements of ClOOCl in the stratosphere: The coupling of ClOOCl and ClO in the Arctic polar vortex, *J. Geophys. Res.*, 109, doi:10.1029/2003JD003811, 2004.
- Tyndall, G. S., Staffelbach, T. A., Orlando, J. J., and Calvert, J. G.: Rate coefficients for the reactions of OH radicals with methylglyoxal and acetaldehyde, *Int. J. Chem. Kinetics*, 27, 1009–1020, 1995.
- Tyndall, G. S., Cox, R. A., Granier, C., Lesclaux, R., Moortgat, G. K., Pilling, M. J., Ravishankara, A. R., and Wallington, T. J.: The atmospheric chemistry of small organic peroxy radicals, *J. Geophys. Res.*, 106D, 12 157–12 182, 2001.
- Villenave, E. and Lesclaux, R.: Kinetics of the cross reactions of CH<sub>3</sub>O<sub>2</sub> and C<sub>2</sub>H<sub>5</sub>O<sub>2</sub> radicals with selected peroxy radicals, *J. Phys. Chem.*, 100, 14 372–14 382, 1996.
- von Kuhlmann, R.: Tropospheric photochemistry of ozone, its precursors and the hydroxyl radical: A 3D-modeling study considering non-methane hydrocarbons, Ph.D. thesis, Johannes Gutenberg-Universität, Mainz, Germany, 2001.
- Yin, F., Grosjean, D., and Seinfeld, J. H.: Photooxidation of dimethyl sulfide and dimethyl disulfide. I: Mechanism development, *J. Atmos. Chem.*, 11, 309–364, 1990.
- Zaveri, R. A. and Peters, L. K.: A new lumped structure photochemical mechanism for large-scale applications, *J. Geophys. Res.*, 104D, 30 387–30 415, 1999.
