# Supplementary material for: The atmospheric chemistry general circulation model ECHAM5/MESSy1: consistent simulation of ozone from the surface to the mesosphere
Source: Copernicus journal article supplement (doi:10.5194/acp-6-5067-2006), 2006-11-07
Supplement: Supplementary file 2 [file acp-6-5067-2006-supplement.zip]

# The Chemical Mechanism of SCAV

Holger Tost & Rolf Sander & Astrid Kerkweg

tost@mpch-mainz.mpg.de, sander@mpch-mainz.mpg.de, akerkweg@mpch-mainz.mpg.de

Air Chemistry Department, Max-Planck Institute of Chemistry, PO Box 3060, 55020 Mainz, Germany

(mechanism generated on April 28, 2006)

Table 1: Heterogeneous reactions

| #      | labels          | reaction                                   | rate coefficient                      | reference                                  |
|--------|-----------------|--------------------------------------------|---------------------------------------|--------------------------------------------|
| H1001f | TrAraMblScScm   | $O_3 \rightarrow O_3(aq)$                  | $k_{\text{exf}}(KPP\_O3)$             | see note                                   |
| H1001b | TrAraMblScScm   | $O_3(aq) \rightarrow O_3$                  | $k_{\text{exb}}(KPP\_O3)$             | see note                                   |
| H2102f | TrAraMblScScm   | $H_2O_2 \rightarrow H_2O_2(aq)$            | $k_{\text{exf}}(KPP\_H2O2)$           | see note                                   |
| H2102b | TrAraMblScScm   | $H_2O_2(aq) \rightarrow H_2O_2$            | $k_{\text{exb}}(KPP\_H2O2)$           | see note                                   |
| H3200f | TrAraNMblScScm  | $NH_3 \rightarrow NH_3(aq)$                | $k_{\text{exf}}(KPP\_NH3)$            | see note                                   |
| H3200b | TrAraNMblScScm  | $NH_3(aq) \rightarrow NH_3$                | $k_{\text{exb}}(KPP\_NH3)$            | see note                                   |
| H3201  | TrAraMblNScScm  | $N_2O_5 \rightarrow HNO_3(aq) + HNO_3(aq)$ | $k_{\text{exf\_N2O5}*C}(KPP\_H2O\_1)$ | Behnke et al. (1994), Behnke et al. (1997) |
| H3203f | TrAraMblNScScm  | $HNO_3 \rightarrow HNO_3(aq)$              | $k_{\text{exf}}(KPP\_HNO3)$           | see note                                   |
| H3203b | TrAraMblNScScm  | $HNO_3(aq) \rightarrow HNO_3$              | $k_{\text{exb}}(KPP\_HNO3)$           | see note                                   |
| H4100f | TrAraMblScScm   | $CO_2 \rightarrow CO_2(aq)$                | $k_{\text{exf}}(KPP\_CO2)$            | see note                                   |
| H4100b | TrAraMblScScm   | $CO_2(aq) \rightarrow CO_2$                | $k_{\text{exb}}(KPP\_CO2)$            | see note                                   |
| H4101f | TrAraScScm      | $HCHO \rightarrow HCHO(aq)$                | $k_{\text{exf}}(KPP\_HCHO)$           | see note                                   |
| H4101b | TrAraScScm      | $HCHO(aq) \rightarrow HCHO$                | $k_{\text{exb}}(KPP\_HCHO)$           | see note                                   |
| H4103f | TrAraScScm      | $HCOOH \rightarrow HCOOH(aq)$              | $k_{\text{exf}}(KPP\_HCOOH)$          | see note                                   |
| H4103b | TrAraScScm      | $HCOOH(aq) \rightarrow HCOOH$              | $k_{\text{exb}}(KPP\_HCOOH)$          | see note                                   |
| H4104f | TrAraScScm      | $CH_3OOH \rightarrow CH_3OOH(aq)$          | $k_{\text{exf}}(KPP\_CH3OOH)$         | see note                                   |
| H4104b | TrAraScScm      | $CH_3OOH(aq) \rightarrow CH_3OOH$          | $k_{\text{exb}}(KPP\_CH3OOH)$         | see note                                   |
| H4200f | TrAraCScScm     | $CH_3COOH \rightarrow CH_3COOH(aq)$        | $k_{\text{exf}}(KPP\_CH3COOH)$        | see note                                   |
| H4200b | TrAraCScScm     | $CH_3COOH(aq) \rightarrow CH_3COOH$        | $k_{\text{exb}}(KPP\_CH3COOH)$        | see note                                   |
| H6200f | TrAraClMblScScm | $HCl \rightarrow HCl(aq)$                  | $k_{\text{exf}}(KPP\_HCl)$            | see note                                   |
| H6200b | TrAraClMblScScm | $HCl(aq) \rightarrow HCl$                  | $k_{\text{exb}}(KPP\_HCl)$            | see note                                   |
| H7200f | TrAraBrMblScScm | $HBr \rightarrow HBr(aq)$                  | $k_{\text{exf}}(KPP\_HBr)$            | see note                                   |
| H7200b | TrAraBrMblScScm | $HBr(aq) \rightarrow HBr$                  | $k_{\text{exb}}(KPP\_HBr)$            | see note                                   |
| H9100f | TrAraSMblScScm  | $SO_2 \rightarrow SO_2(aq)$                | $k_{\text{exf}}(KPP\_SO2)$            | see note                                   |
| H9100b | TrAraSMblScScm  | $SO_2(aq) \rightarrow SO_2$                | $k_{\text{exb}}(KPP\_SO2)$            | see note                                   |
| H9200  | TrAraSMblScScm  | $H_2SO_4 \rightarrow H_2SO_4(aq)$          | $k_{\text{exf}}(KPP\_H2SO4)$          | see note                                   |

\*Notes: The forward (**k\_exf**) and backward (**k\_exb**) rate coefficients are calculated in the file `messy_scav_base.f90` using the accommodation coefficients in subroutine `scav_alpha` and Henry's law constants in subroutine `scav_henry`. The rate coefficients are determined with the help of  $k_{\text{mt}}$ , the mass transfer coefficient, the Henry coefficient and the LWC (liquid water content) of the droplets, both in clouds and precipitation.

Table 2: Acid-base and other equilibria

| #    | labels          | reaction                                                                         | $K_0 [M^{m-n}]$ | $-\Delta H/R[K]$ | reference                  |
|------|-----------------|----------------------------------------------------------------------------------|-----------------|------------------|----------------------------|
| EQ21 | TrAraMblScScm   | $\text{H}_2\text{O} \rightleftharpoons \text{H}^+ + \text{OH}^-$                 | 1.0E-16         | -6716            | Chameides (1984)           |
| EQ30 | TrAraMblNScScm  | $\text{NH}_4^+ \rightleftharpoons \text{H}^+ + \text{NH}_3$                      | 5.88E-10        | -2391            | Chameides (1984)           |
| EQ32 | TrAraMblNScScm  | $\text{HNO}_3 \rightleftharpoons \text{H}^+ + \text{NO}_3^-$                     | 15              | 8700             | Davis and de Bruin (1964)  |
| EQ40 | TrAraMblScScm   | $\text{CO}_2 \rightleftharpoons \text{H}^+ + \text{HCO}_3^-$                     | 4.3E-7          | -913             | Chameides (1984)           |
| EQ41 | TrAraScScm      | $\text{HCOOH} \rightleftharpoons \text{H}^+ + \text{HCOO}^-$                     | 1.8E-4          |                  | Weast (1980)               |
| EQ42 | TrAraCScScm     | $\text{CH}_3\text{COOH} \rightleftharpoons \text{H}^+ + \text{CH}_3\text{COO}^-$ | 1.75E-5         | -46              | see note                   |
| EQ61 | TrAraClMblScScm | $\text{HCl} \rightleftharpoons \text{H}^+ + \text{Cl}^-$                         | 1.7E6           | 6896             | Marsh and McElroy (1985)   |
| EQ71 | TrAraBrMblScScm | $\text{HBr} \rightleftharpoons \text{H}^+ + \text{Br}^-$                         | 1.0E9           |                  | Lax (1969)                 |
| EQ90 | TrAraSMblScScm  | $\text{SO}_2 \rightleftharpoons \text{H}^+ + \text{HSO}_3^-$                     | 1.7E-2          | 2090             | Chameides (1984)           |
| EQ91 | TrAraSMblScScm  | $\text{HSO}_3^- \rightleftharpoons \text{H}^+ + \text{SO}_3^{2-}$                | 6.0E-8          | 1120             | Chameides (1984)           |
| EQ92 | TrAraSMblScScm  | $\text{HSO}_4^- \rightleftharpoons \text{H}^+ + \text{SO}_4^{2-}$                | 1.2E-2          | 2720             | Seinfeld and Pandis (1998) |
| EQ93 | TrAraSMblScScm  | $\text{H}_2\text{SO}_4 \rightleftharpoons \text{H}^+ + \text{HSO}_4^-$           | 1.0E3           |                  | Seinfeld and Pandis (1998) |

Table 3: Aqueous phase reactions

| #     | labels         | reaction                                                                          | $k_0 [M^{1-n} s^{-1}]$ | $-E_a/R[K]$ | reference                  |
|-------|----------------|-----------------------------------------------------------------------------------|------------------------|-------------|----------------------------|
| A9101 | TrAraSMblScScm | $\text{SO}_3^{2-} + \text{O}_3 \rightarrow \text{SO}_4^{2-}$                      | 1.5E9                  | -5300       | Hoffmann (1986)            |
| A9206 | TrAraSMblScScm | $\text{HSO}_3^- + \text{O}_3 \rightarrow \text{SO}_4^{2-} + \text{H}^+$           | 3.7E5                  | -5500       | Hoffmann (1986)            |
| A9209 | TrAraSMblScScm | $\text{HSO}_3^- + \text{H}_2\text{O}_2 \rightarrow \text{SO}_4^{2-} + \text{H}^+$ | 5.2E6                  | -3650       | Martin and Damschen (1981) |

## References

- Behnke, W., Scheer, V., and Zetzsch, C.: Production of  $\text{BrNO}_2$ ,  $\text{Br}_2$  and  $\text{ClNO}_2$  from the reaction between sea spray aerosol and  $\text{N}_2\text{O}_5$ , *J. Aerosol Sci.*, 25, S277–S278, 1994.
- Behnke, W., George, C., Scheer, V., and Zetzsch, C.: Production and decay of  $\text{ClNO}_2$  from the reaction of gaseous  $\text{N}_2\text{O}_5$  with  $\text{NaCl}$  solution: Bulk and aerosol experiments, *J. Geophys. Res.*, 102D, 3795–3804, 1997.
- Chameides, W. L.: The photochemistry of a remote marine stratiform cloud, *J. Geophys. Res.*, 89D, 4739–4755, 1984.
- Davis, Jr., W. and de Bruin, H. J.: New activity coefficients of 0-100 per cent aqueous nitric acid, *J. Inorg. Nucl. Chem.*, 26, 1069–1083, 1964.
- Deister, U. and Warneck, P.: Photooxidation of  $\text{SO}_3^{2-}$  in aqueous solution, *J. Phys. Chem.*, 94, 2191–2198, 1990.
- Exner, M., Herrmann, H., and Zellner, R.: Laser-based studies of reactions of the nitrate radical in aqueous solution, *Ber. Bunsenges. Phys. Chem.*, 96, 470–477, 1992.
- Hoffmann, M. R.: On the kinetics and mechanism of oxidation of aquated sulfur dioxide by ozone, *Atmos. Environ.*, 20, 1145–1154, 1986.
- Huie, R. E. and Neta, P.: Rate constants for some oxidations of  $\text{S(IV)}$  by radicals in aqueous solutions, *Atmos. Environ.*, 21, 1743–1747, 1987.
- Jacobi, H.-W.: Kinetische Untersuchungen und Modellrechnungen zur troposphärischen Chemie von Radikalanionen und Ozon in wäßriger Phase, Ph.D. thesis, Universität GH Essen, FRG, 1996.
- Lax, E.: Taschenbuch für Chemiker und Physiker, Springer Verlag, Berlin, 1969.
- Marsh, A. R. W. and McElroy, W. J.: The dissociation constant and Henry’s law constant of  $\text{HCl}$  in aqueous solution, *Atmos. Environ.*, 19, 1075–1080, 1985.
- Martin, L. R. and Damschen, D. E.: Aqueous oxidation of sulfur dioxide by hydrogen peroxide at low pH, *Atmos. Environ.*, 15, 1615–1621, 1981.
- Seinfeld, J. H. and Pandis, S. N.: *Atmospheric Chemistry and Physics*, John Wiley & Sons, Inc., 1998.
- Wagman, D. D., Evans, W. H., Parker, V. B., Schumm, R. H., Halow, I., Bailey, S. M., Churney, K. L., and Nuttall, R. L.: The NBS tables of chemical thermodynamic properties; Selected values for inorganic and  $\text{C}_1$  and  $\text{C}_2$  organic substances in SI units, *J. Phys. Chem. Ref. Data*, 11, suppl. 2, 1982.
- Warneck, P.: Chemical reactions in clouds, *Fresenius J. Anal. Chem.*, 340, 585–590, 1991.
- Weast, R. C., ed.: *CRC Handbook of Chemistry and Physics*, 61st Edition, CRC Press, Inc., Boca Raton, FL, 1980.
